# Supplementary material for: Comparative Genomics of Serial Isolates of Cryptococcus neoformans Reveals Gene Associated With Carbon Utilization and Virulence
Source: PubMed Central journal article supplement (PMC3618354; doi:10.1534/g3.113.005660), 2013-04-01
Supplement: supp_g3.113.005660_005660SI.pdf [file supp_g3.113.005660_005660SI.pdf]

## Comparative genomics of serial isolates of *Cryptococcus neoformans* reveals gene associated with carbon utilization and virulence

Kate L. Ormerod<sup>\*,§</sup>, Carl A. Morrow<sup>\*,§</sup>, Eve W. L. Chow<sup>\*,§</sup>, I. Russel Lee<sup>\*,§</sup>, Samantha D. M. Arras<sup>\*,§</sup>, Horst Joachim Schirra<sup>†,§</sup>, Gary M. Cox<sup>‡</sup>, Bettina C. Fries<sup>§§,\*\*</sup> and James A. Fraser<sup>\*,§1</sup>

Australian Infectious Diseases Research Centre,  
University of Queensland, Brisbane, QLD 4072 Australia<sup>\*</sup>

School of Chemistry and Molecular Biosciences,  
University of Queensland, Brisbane, QLD 4072 Australia<sup>§</sup>

Centre for Advanced Imaging,  
University of Queensland, Brisbane, QLD 4072 Australia<sup>†</sup>

Department of Medicine,  
Mycology Research Unit,  
Duke University, Durham, NC 27710 USA<sup>‡</sup>

Department of Microbiology & Immunology,  
Albert Einstein College of Medicine, Bronx, NY 10461 USA<sup>§§</sup>

Department of Medicine,  
Albert Einstein College of Medicine, Bronx, NY 10461 USA<sup>\*\*</sup>

<sup>1</sup>Corresponding author:

358 Molecular Biosciences Building, Cooper Road  
The University of Queensland  
Brisbane, QLD 4072 Australia  
Phone: +61 7 3365 4868  
Fax: +61 7 3365 4273  
Email: jafraser@uq.edu.au

DOI: 10.1534/g3.113.005660

(A)

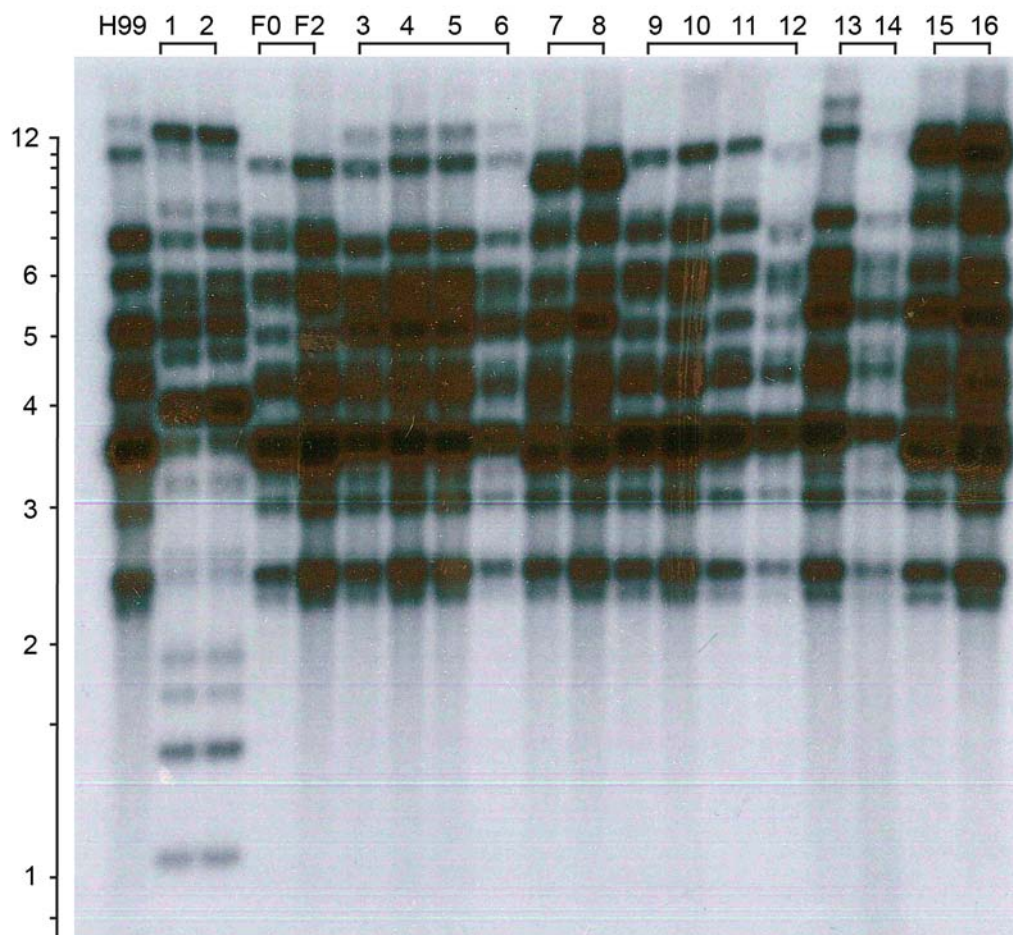

(B)

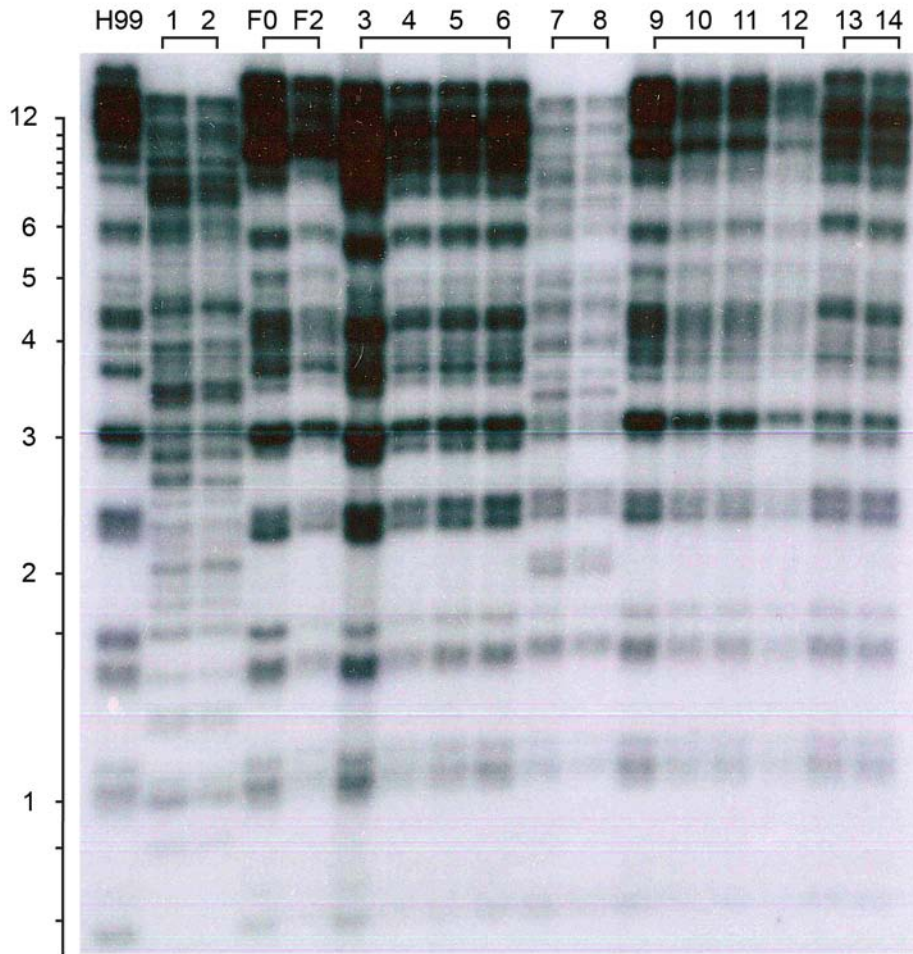

(C)

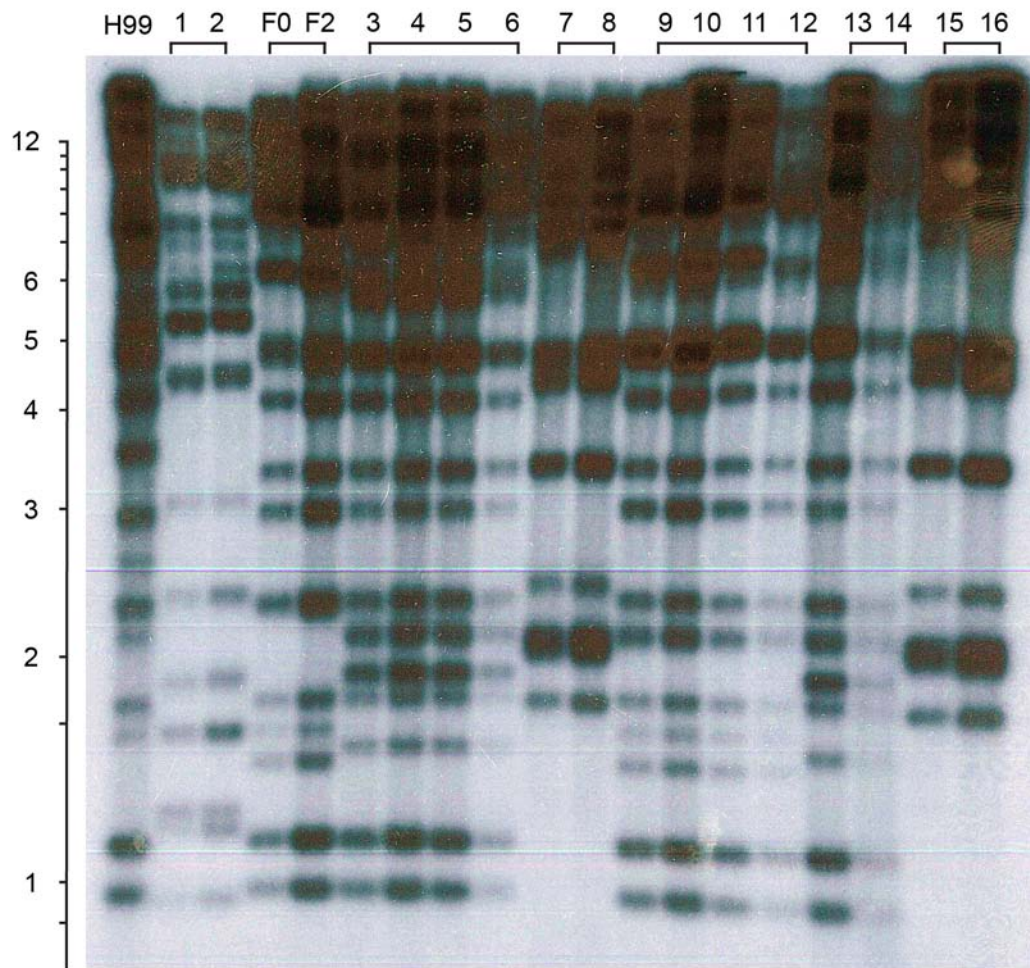

(D)

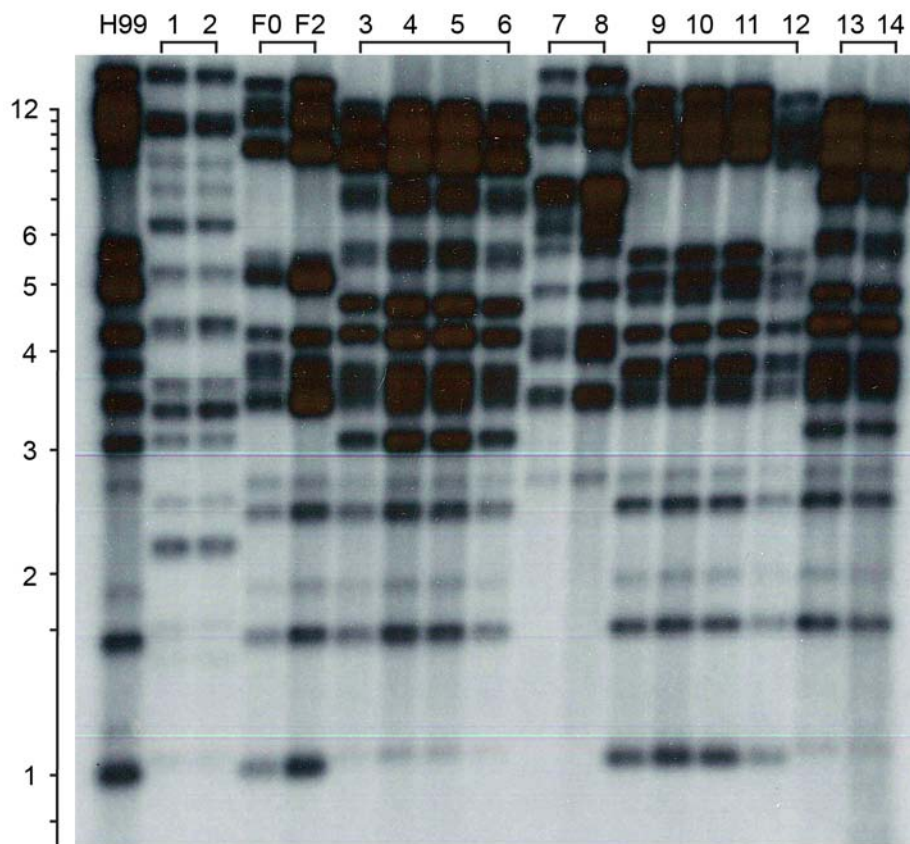

(E)

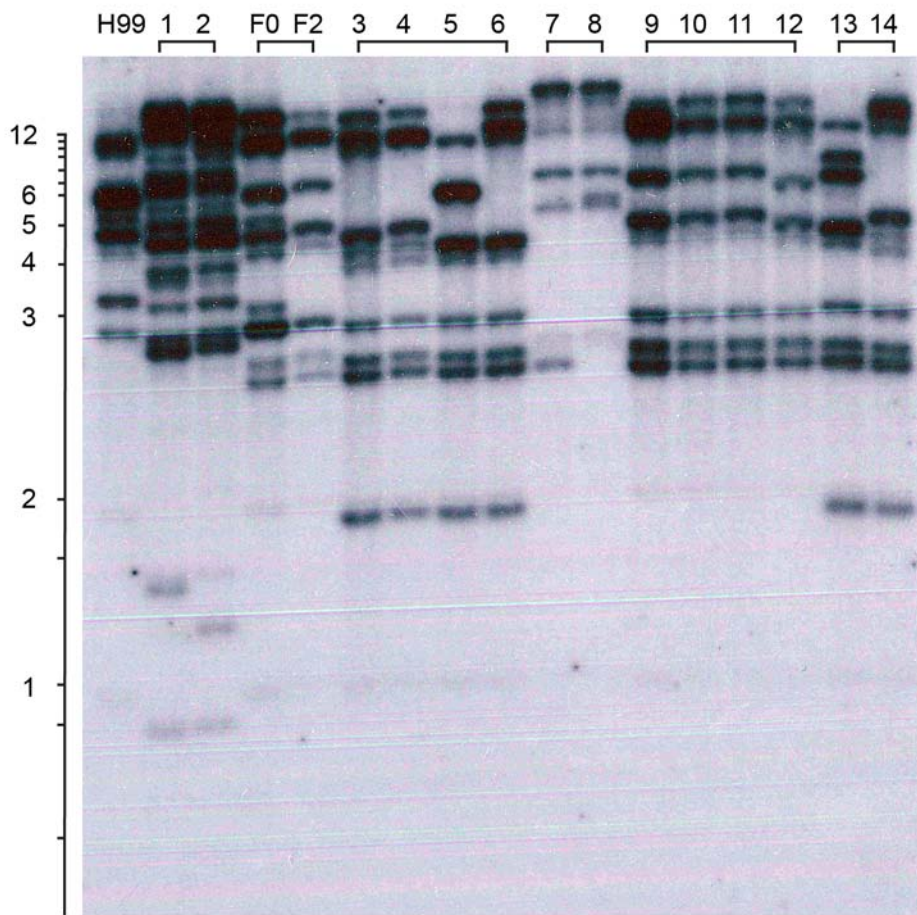

(F)

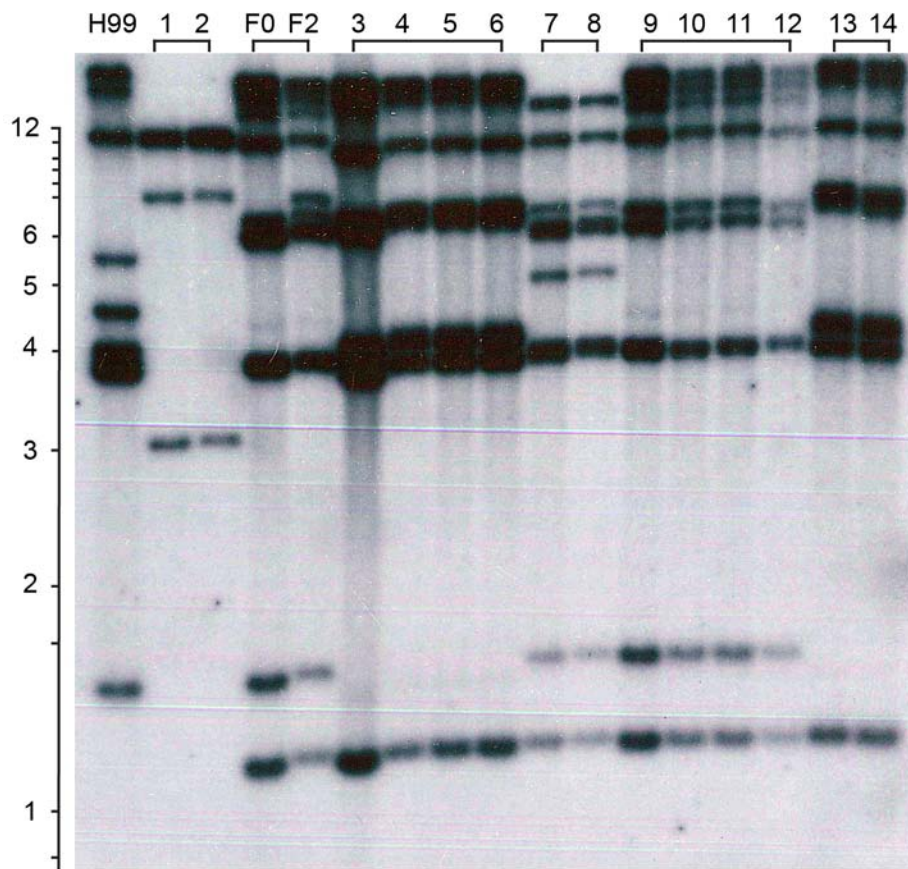

**FIGURE S1** Transposon profiles of F0 and F2 are the same for Cnirt2, Tcn1, Tcn2 and Tcn4 but different for Tcn6, a highly mobile transposon. Southern blot analysis of serial isolates (sets marked with rectangles) probed with transposon fragments of (A) Cnirt2, (B) Tcn1, (C) Tcn2, (D) Tcn4, (E) Tcn6 internal region, (F) Tcn6 LTR. Strains 1 to 16 are serial clinical isolates that have not as yet been characterized.

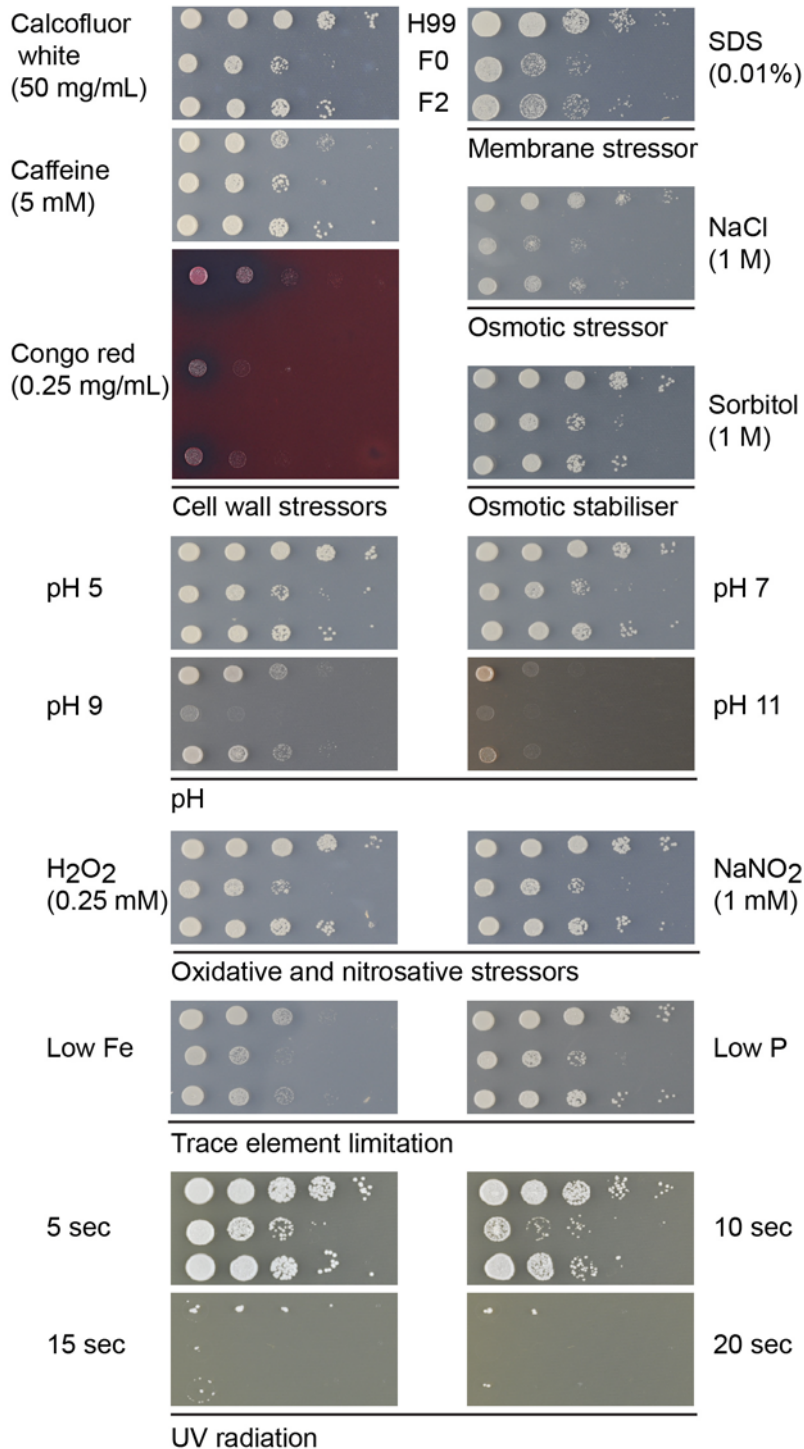

**FIGURE S2 F0 and F2 exhibit similar responses to a variety of stresses.** 10-fold serial dilutions of indicated strains were spotted onto minimal media supplemented with various stressors and incubated at 30° for 2-3 days. The growth defect of F0 is not exacerbated by growth on cell wall stressors. F0 and F2 show increased sensitivity to cell membrane and osmotic stress. No difference in growth is seen on the osmotic stabilizer sorbitol. Increased sensitivity to high pH (9 and 11) is seen in F0. No increased sensitivity is seen in either F0 or F2 under selected oxidative or nitrosative stressors or nutrient limitation. No increased sensitivity is seen in F0 or F2 when exposed to UV radiation.



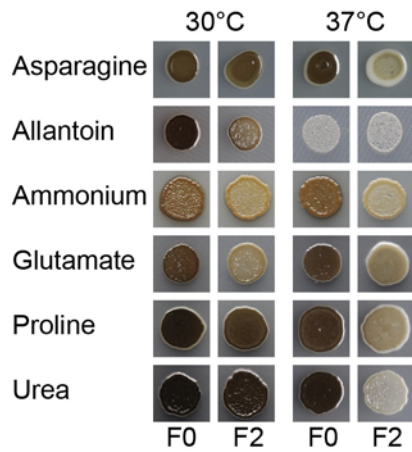

**FIGURE S3 Melanin production in F2 is reduced on multiple nitrogen sources.** When grown on L-DOPA containing *Cryptococcus* melanization media supplemented with various nitrogen sources, F2 exhibits a significant melanization defect at 37°, also visible on many nitrogen sources at 30°.

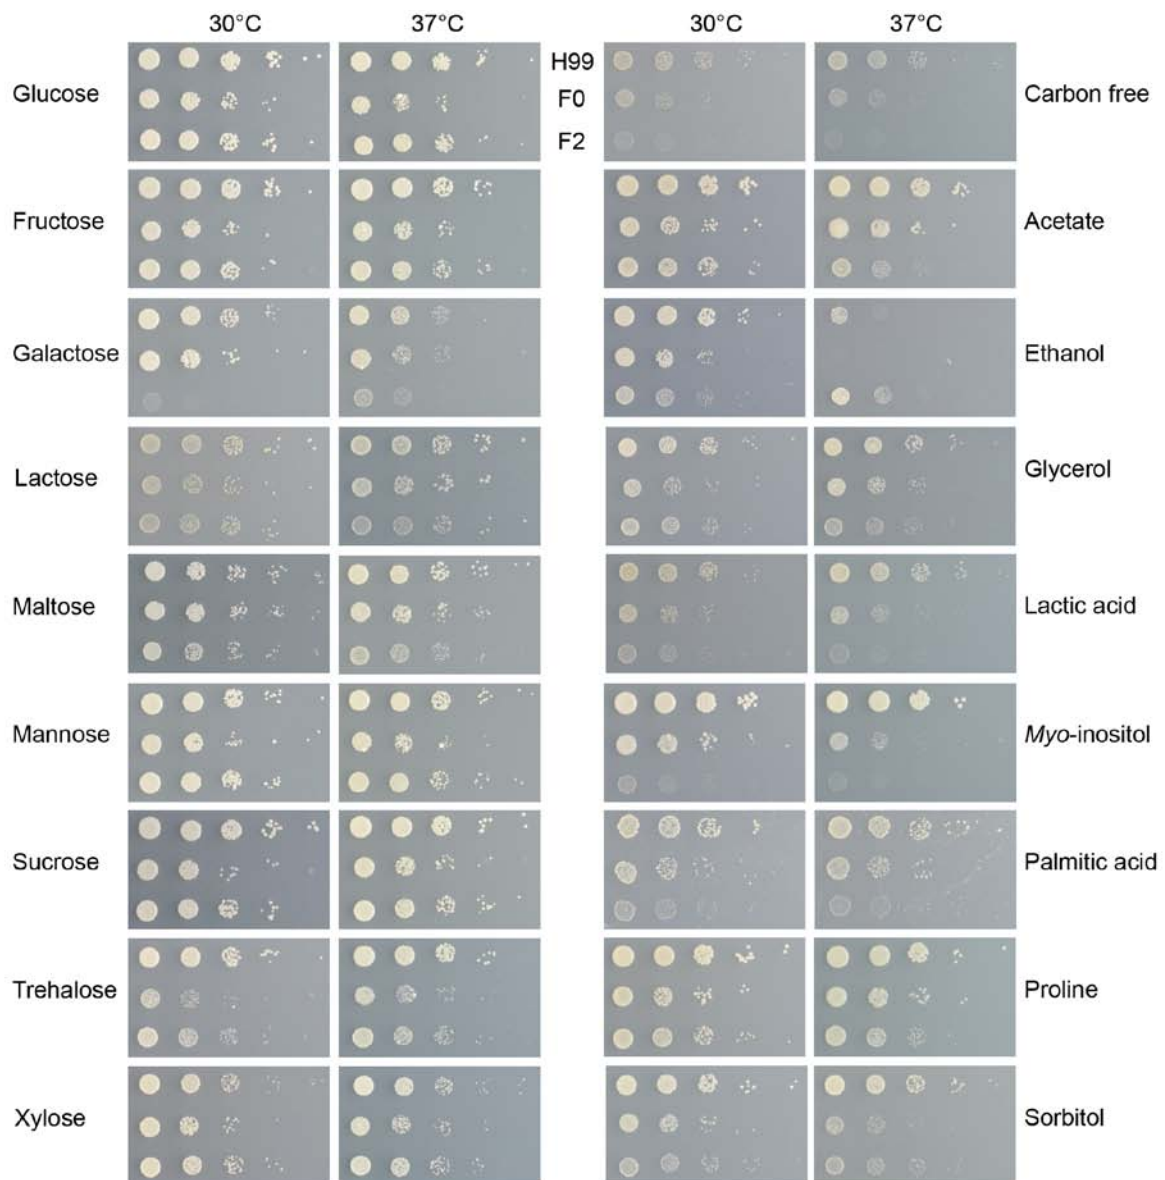

**FIGURE S4 F0 and F2 exhibit different growth on alternate carbon sources.** 10-fold serial dilutions of indicated strains were spotted onto minimal media supplemented with various carbon sources and incubated at 30 and 37° for 2 to 3 days.

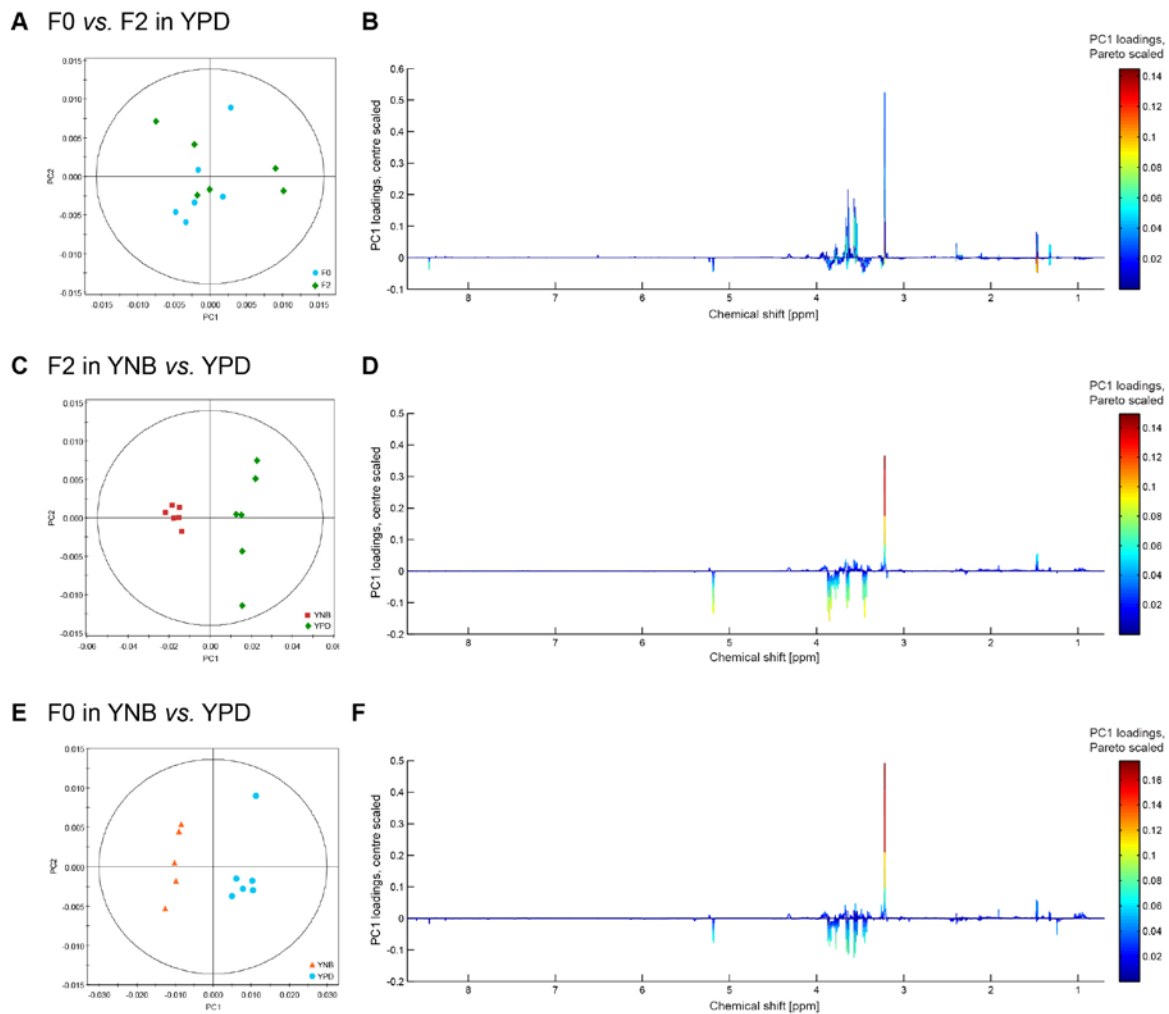

**FIGURE S5** Pairwise comparisons of metabolic profiles with principal components analysis. (A) & (B) Comparison of F0 (cyan circles) with F2 (green diamonds) in YPD medium. (C) & (D) Comparison between F2 in YNB (red squares) and YPD (green diamonds) medium. (E) & (F) Comparison between F0 in YNB (orange triangles) and YPD (cyan circles) medium. (A), (C) & (E): Principal components analysis scores plots. Hotelling's 95% confidence range of the PCA model is indicated in the scores plots by an ellipse. (B), (D) & (F): Bivariate loadings plot with center scaled loadings coefficients shown as intensity, and Pareto scaled coefficients as heatmap.

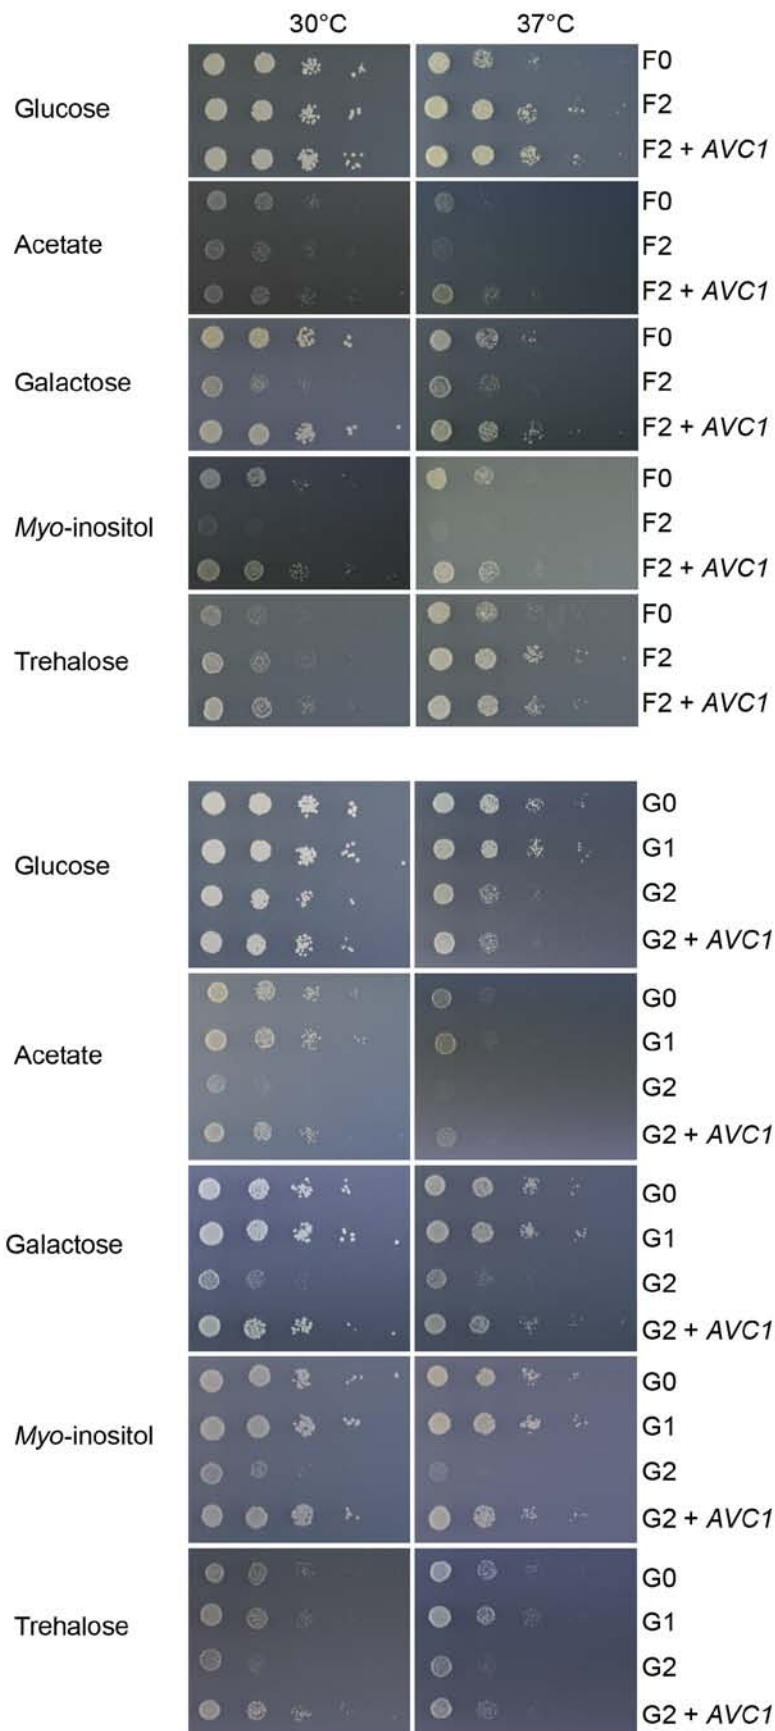

**FIGURE S6** Reintroduction of ARID-containing gene *AVC1* rescues growth on alternate carbon sources. Growth assays on minimal media supplemented with various carbon sources.

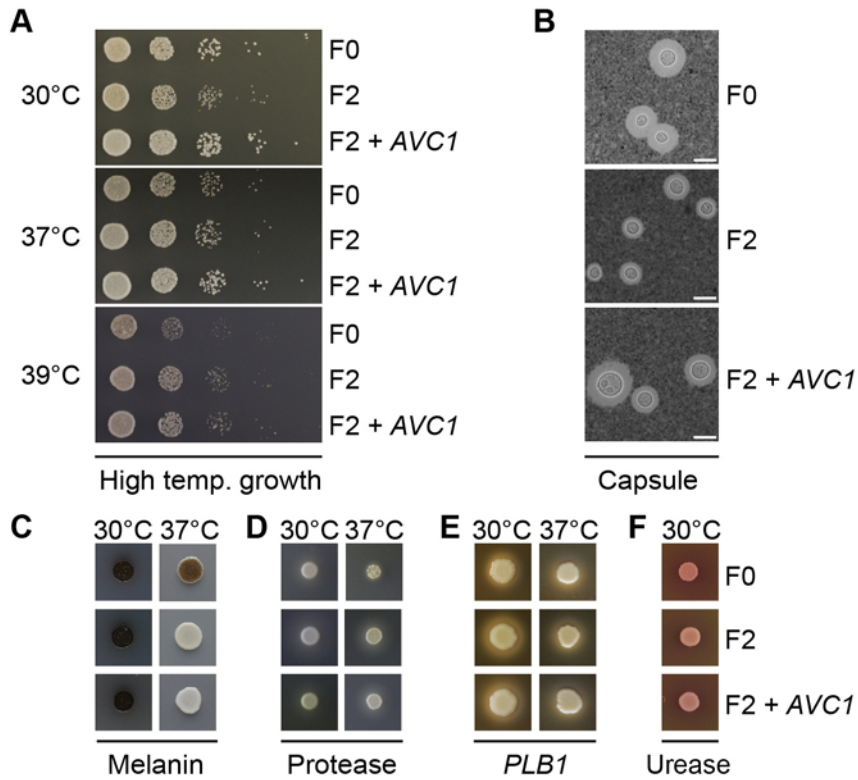

**FIGURE S7** Reintroduction of ARID-containing *AVC1* rescues capsule but not melanin production in F2. **(A)** Growth assays at 30°, human body temperature of 37° and febrile body temperature of 39° on YPD; no change was observed following reintroduction of *AVC1*. **(B)** India ink staining under light microscopy reveals the capsule; capsule production in F2 is increased following reintroduction of *AVC1*. Scale bar is 10  $\mu$ M. **(C)** Melanization on L-DOPA containing media continued to be inhibited in F2 following reintroduction of *AVC1*. **(D)**, **(E)** & **(F)** Comparable levels of protease, phospholipase and urease production were observed following reintroduction of *AVC1* when strains were grown on BSA, egg yolk and Christensen's agar, respectively.

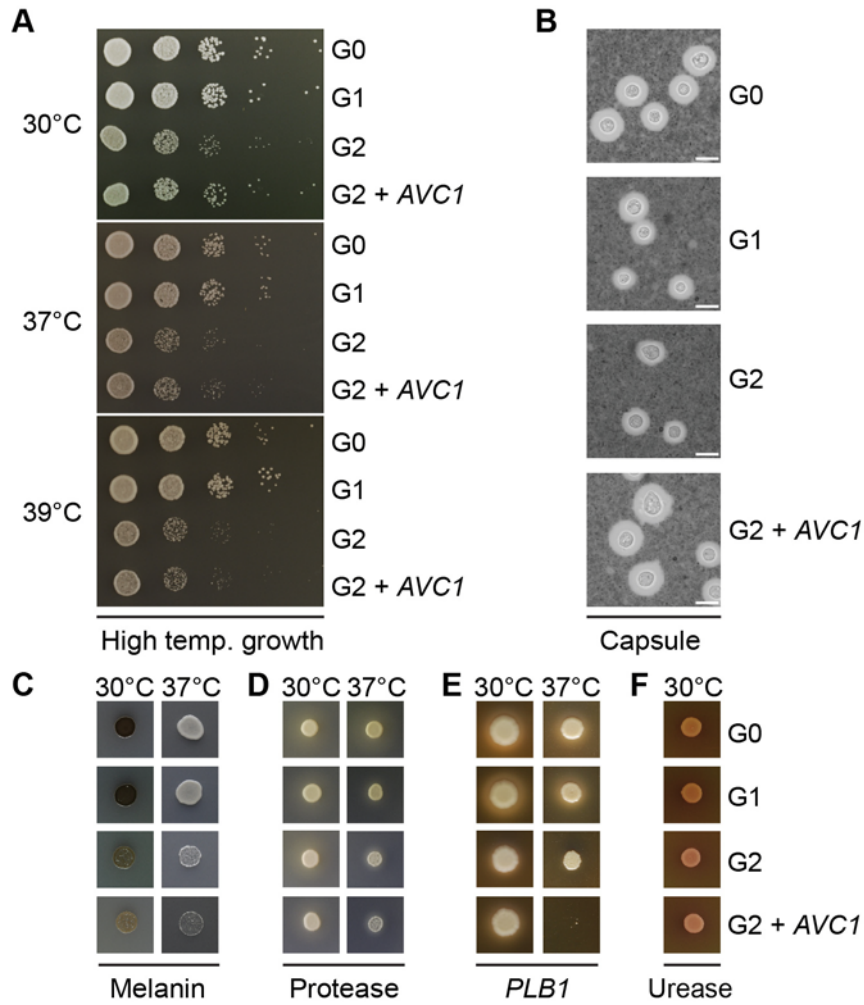

**FIGURE S8** Reintroduction of ARID-containing *AVC1* rescues capsule production in G2. **(A)** Growth assays at 30°, human body temperature of 37° and febrile body temperature of 39° on YPD; no change was observed following reintroduction of *AVC1*. **(B)** India ink staining under light microscopy reveals the capsule; capsule production in G2 is increased following reintroduction of *AVC1*. Scale bar is 10  $\mu$ M. **(C)** Melanization on L-DOPA containing media continued to be inhibited in G2 following reintroduction of *AVC1*. **(D)**, **(E)** & **(F)** Comparable levels of protease, phospholipase and urease production were observed following reintroduction of *AVC1* when strains were grown on BSA, egg yolk and Christensen's agar, respectively. No growth was observed for G2 + *AVC1* on egg yolk agar at 37°.

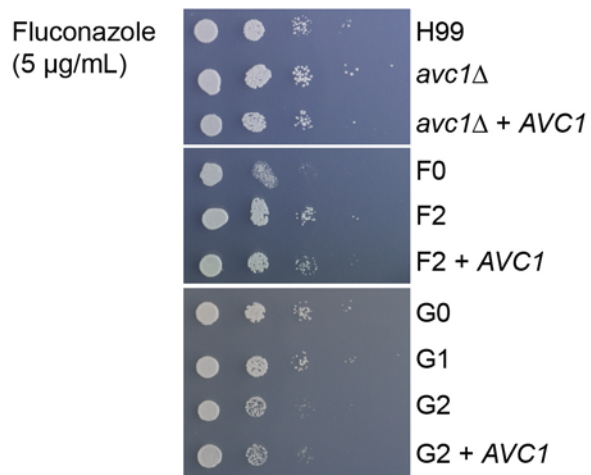

**FIGURE S9 Deletion of *AVC1* increases resistance to fluconazole.** Both *avc1*Δ and F2 exhibit increased growth on minimal media containing fluconazole (5 µg/mL) which is abolished when the gene is reintroduced. Growth is comparable between G2 and G2 + *AVC1*.

## File S1

### Supplementary materials and methods

#### Media

*Cryptococcus* strains were cultured in YPD (1% yeast extract, 2% Bacto-peptone, 2% glucose) and maintained at 4°C on YPD solidified with 2% agar or stored at -80°C in 15% glycerol. Phenotypic assays were conducted on YNB (yeast nitrogen base without amino acids and ammonium sulfate (BD, Franklin Lakes, NJ), 2% sugar or 10 mM carbon source, 10 mM nitrogen source, 2% agar). L-3,4-dihydroxyphenylalanine (L-DOPA) media with 10 mM nitrogen source for melanization assays was prepared as described (Chaskes and Tyndall 1975). Urease assays were conducted on Christensen's urea agar (Christensen 1946). Protease production was assayed using YNB with amino acids and ammonium sulfate supplemented with 2% glucose and 0.1% bovine serum albumin (Sigma-Aldrich, St Louis, MO). Phospholipase production was assayed on egg yolk agar as described (Chen *et al.* 1997). Capsule production was induced in liquid RPMI 1640 medium (Life Technologies, Carlsbad, CA) supplemented with 2% glucose and 10% foetal bovine serum (Life Technologies) as described (Zaragoza *et al.* 2003). *C. elegans* was maintained at 16°C on nematode growth medium as described (Brenner 1974).

#### Phenotypic assays

Starter cultures were prepared by growth in YPD at 30°C overnight with shaking, diluted to OD<sub>595 nm</sub> = 0.05 in water, then further diluted 10-fold in series. For growth, carbon utilization, melanization and stress assays, dilutions were spotted onto YPD, YNB supplemented with 2% sugar or 10 mM carbon source, L-DOPA or YNB supplemented with 5 mM caffeine, 0.25 mg/mL Congo red, 50 mg/mL calcofluor white, 0.01% SDS, 1 M sorbitol, 1 M NaCl, 0.25 mM H<sub>2</sub>O<sub>2</sub> or 1 mM NaNO<sub>2</sub> as indicated. Images were taken following 2-3 days incubation at 30 (stress, phospholipase, protease, urease, nitrogen utilization), 30 and 37°C (carbon utilization and melanization), or 30, 37 and 39°C (growth). UV stress assay was conducted by exposing freshly spotted (YPD) cultures to 48 mJ/cm<sup>2</sup> UV light for 6, 12, 18 or 24 seconds in a UV Stratalinker (Stratagene). Capsule production was assayed at 30°C with shaking and aliquots taken at 24 h. India ink (BD) staining was performed prior to visualization on a Zeiss Axioplan 2 epifluorescent/light microscope fitted with Axiocam greyscale camera running AxioVision AC software. Difference in capsule size was determined by calculating the ratio of capsule to cell diameter for each strain, measuring 50 cells per strain across 10 independent fields (Zaragoza *et al.* 2003). Statistical significance was determined using the unpaired, two-tailed *t*-test with *p* values <0.05 considered significant.

#### Fluconazole minimum inhibitory concentration determination

Minimum inhibitory concentration (MIC) assays were undertaken in biological triplicate following the broth microdilution protocol published by the Clinical and Laboratory Standards Institute (M27-A3) modified for *Cryptococcus* (Ghannoum *et al.* 1992). Fluconazole concentrations tested ranged from 0.1 to 50 µg/mL in two-fold dilutions. Plates were incubated at



35°C for 72 h, scored visually at 24 h intervals and end-point reading taken electronically using a SpectraMax 250 (Molecular Devices). MIC<sub>90</sub> (the lowest concentration of drug inhibiting 90% of growth) was recorded. *Candida albicans* (ATCC90028), *Candida krusei* (ATCC6258), *Candida parapsilosis* (ATCC22019) and *C. neoformans* var. *grubii* (ATCC90113) were included as reference strains.

### **Read trimming and mapping**

Quality was analyzed using FastQC (<http://www.bioinformatics.bbsrc.ac.uk/projects/fastqc/>). Reads were trimmed using CLC Genomics Workbench (4.6.1, CLC bio, Denmark) based on a phred-scaled quality score of 20 prior to mapping with this software. Post-trimming reads  $\geq$  30 nt were retained (77%, 78% and 77% respectively). BWA 0.5.9 (Li and Durbin 2009) was run on untrimmed reads. Reads were mapped using BWA and CLC Genomics Workbench using the unpublished, annotated H99 genome ([www.broadinstitute.org/annotation/genome/cryptococcus\\_neoformans/MultiHome.html](http://www.broadinstitute.org/annotation/genome/cryptococcus_neoformans/MultiHome.html)) as a reference. BWA was run with default settings. Marking of duplicate reads, realignment of reads around indels and recalibration of quality scores was then undertaken following the Genome Analysis Toolkit (GATK) pipeline (McKenna *et al.* 2010; DePristo *et al.* 2011). Recalibration was performed using a list of putative SNVs identified with GATK UnifiedGenotyper. Filters were applied as described (DePristo *et al.* 2011) with a required SNV frequency of 70% of reads. CLC Genomics Workbench was run using required read similarity of 95% and an insert size range of 130 to 300 bp. Other settings were left at default values.

### **De novo assembly**

SOAP *de novo* 1.05 (Li *et al.* 2008) and CLC Genomics Workbench were used to produce *de novo* assemblies using reads trimmed either with CLC Genomics Workbench as described above or with Trimmomatic ([www.usadellab.org/cms/index.php?page=trimmomatic](http://www.usadellab.org/cms/index.php?page=trimmomatic)) using a quality cutoff of 20 across a sliding window of 4 nt, removing leading and trailing 3 nt from all reads and retaining post-trimming reads with length  $\geq$  30 nt. Assemblies were used as support for structural variation predictions. Separate *de novo* assemblies were run using unmapped reads in order to identify unique insertion sequences. Unmapped reads were extracted from BWA alignments using SAMtools 0.1.17 (Li *et al.* 2009) and Picard SamToFastq ([picard.sourceforge.net](http://picard.sourceforge.net)). Assembled contigs were matched to the H99 genome using BLAST (Altschul *et al.* 1990). Potential insertion contigs from SOAP *de novo* were aligned to CLC Genomics Workbench contigs using BLAST to confirm the insert sequence.

### **Identification of repetitive regions**

Transposable elements were identified using RepeatMasker (version open-3.3.0) (Smit *et al.* 1996-2010) with repeat library 20110419 utilizing the cross\_match (version 0.990329) search engine (<http://www.phrap.org/index.html>). Additional

matches to known transposons of *C. neoformans* were identified via a BLAST search and annotated with blast2gffv3 ([code.google.com/p/jperl/source/browse/trunk/scripts/Blast2Gff.pl?r=61](http://code.google.com/p/jperl/source/browse/trunk/scripts/Blast2Gff.pl?r=61)). LTRHarvest (Ellinghaus *et al.* 2008) was used to predict LTR retrotransposons. Tandem repeats were identified using Tandem Repeats Finder (Benson 1999) and annotated using TRAP (Sobreira *et al.* 2006).

### **Genomic variation detection**

Structural variation was detected using BreakDancer (Chen *et al.* 2009) (minimum mapping quality = 20, minimum supporting reads = 4), CREST (Wang *et al.* 2011) and Dindel (Albers *et al.* 2011). BreakDancer predictions with >90% confidence were examined manually. Dindel predictions present in both F0 and F2 were identified using BEDTools (Quinlan and Hall 2010). Dindel was also run on H99 mappings and F0 and F2 predictions overlapping with these were excluded. Unique predictions in F0 and F2 were examined manually. Validation was performed using primers listed (Table S4). Identification of synteny was performed using Mauve (Pareek *et al.* 2011). SNVs were identified using GATK UnifiedGenotyper with filters as described and CLC Genomics Workbench with default settings. Centromere regions were excluded from analysis. Comparisons between strains were performed using BEDtools (Quinlan and Hall 2010) and CLC Genomics Gateway beta. Figure 4 was constructed using Circos (Krzywinski *et al.* 2009). Copy number variation was detected using FREEC (Boeva *et al.* 2011) employing a 1,001 bp windows with a 100 bp step size and using H99 as control. Altered copy regions were then manually examined in Integrative Genomics Viewer 1.5 (Robinson *et al.* 2011), filtering out regions identified within telomeres and centromeres due to their repetitive nature. Coverage at the chromosome and gene level was determined using GATK DepthOfCoverage and CLC Genomics Workbench. rDNA and mitochondrial genome copy number was calculated as described (James *et al.* 2009).

## References

- Albers, C. A., G. Lunter, D. G. MacArthur, G. McVean, W. H. Ouwehand *et al.*, 2011 Dindel: Accurate indel calls from short-read data. *Genome Res.* **21**: 961-973.
- Altschul, S. F., W. Gish, W. Miller, E. W. Myers, and D. J. Lipman, 1990 Basic local alignment search tool. *J. Mol. Biol.* **215**: 403-410.
- Benson, G., 1999 Tandem repeats finder: a program to analyze DNA sequences. *Nucleic Acids Res.* **27**: 573-580.
- Boeva, V., A. Zinovyev, K. Bleakley, J. P. Vert, I. Janoueix-Lerosey *et al.*, 2011 Control-free calling of copy number alterations in deep-sequencing data using GC-content normalization. *Bioinformatics* **27**: 268-269.
- Brenner, S., 1974 Genetics of *Caenorhabditis elegans*. *Genetics* **77**: 71-94.
- Chaskes, S., and R. L. Tyndall, 1975 Pigment production of *Cryptococcus neoformans* from *para*-diphenols and *ortho*-diphenols: Effect of nitrogen source. *J. Clin. Microbiol.* **1**: 509-514.
- Chen, K., J. W. Wallis, M. D. McLellan, D. E. Larson, J. M. Kalicki *et al.*, 2009 BreakDancer: an algorithm for high-resolution mapping of genomic structural variation. *Nat Meth* **6**: 677-681.
- Chen, S. C. A., M. Muller, J. Z. Zhou, L. C. Wright, and T. C. Sorrell, 1997 Phospholipase activity in *Cryptococcus neoformans*: A new virulence factor? *J. Infect. Dis.* **175**: 414-420.
- Christensen, W. B., 1946 Urea decomposition as a means of differentiating *Proteus* and paracolony cultures from each other and from *Salmonella* and *Shigella* types. *J. Bacteriol.* **52**: 461-466.
- DePristo, M., E. Banks, R. Poplin, K. Garimella, J. Maguire *et al.*, 2011 A framework for variation discovery and genotyping using next-generation DNA sequencing data. *Nat. Genet.* **43**: 491-498.
- Ellinghaus, D., S. Kurtz, and U. Willhoeft, 2008 LTRharvest, an efficient and flexible software for de novo detection of LTR retrotransposons. *BMC Bioinformatics* **9**: 18. doi: 10.1186/1471-2105-9-18.
- Ghannoum, M. A., A. S. Ibrahim, Y. Fu, M. C. Shafiq, J. E. Edwards *et al.*, 1992 Susceptibility testing of *Cryptococcus neoformans*: A microdilution technique. *J. Clin. Microbiol.* **30**: 2881-2886.
- James, S. A., M. J. T. O'Kelly, D. M. Carter, R. P. Davey, A. van Oudenaarden *et al.*, 2009 Repetitive sequence variation and dynamics in the ribosomal DNA array of *Saccharomyces cerevisiae* as revealed by whole-genome resequencing. *Genome Res.* **19**: 626-635.
- Krzywinski, M., J. Schein, I. Birol, J. Connors, R. Gascoyne *et al.*, 2009 Circos: An information aesthetic for comparative genomics. *Genome Res.* **19**: 1639-1645.
- Li, H., and R. Durbin, 2009 Fast and accurate short read alignment with Burrows-Wheeler transform. *Bioinformatics* **25**: 1754-1760.
- Li, H., B. Handsaker, A. Wysoker, T. Fennell, J. Ruan *et al.*, 2009 The Sequence Alignment/Map format and SAMtools. *Bioinformatics* **25**: 2078-2079.

- Li, R., Y. Li, K. Kristiansen, and J. Wang, 2008 SOAP: short oligonucleotide alignment program. *Bioinformatics* **24**: 713-714.
- McKenna, A., M. Hanna, E. Banks, A. Sivachenko, K. Cibulskis *et al.*, 2010 The Genome Analysis Toolkit: a MapReduce framework for analyzing next-generation DNA sequencing data. *Genome Res.* **20**: 1297-1303.
- Pareek, C. S., R. Smoczynski, and A. Tretyn, 2011 Sequencing technologies and genome sequencing. *J. Appl. Genetics* **52**: 413-435.
- Quinlan, A. R., and I. M. Hall, 2010 BEDTools: A flexible suite of utilities for comparing genomic features. *Bioinformatics* **26**: 841-842.
- Robinson, J. T., H. Thorvaldsdottir, W. Winckler, M. Guttman, E. S. Lander *et al.*, 2011 Integrative genomics viewer. *Nat. Biotechnol.* **29**: 24-26.
- Smit, A. F. A., R. Hubley, and P. Green, 1996-2010 RepeatMasker Open-3.0.
- Sobreira, T. J. P., A. M. Durham, and A. Gruber, 2006 TRAP: automated classification, quantification and annotation of tandemly repeated sequences. *Bioinformatics* **22**: 361-362.
- Wang, J. M., C. G. Mullighan, J. Easton, S. Roberts, S. L. Heatley *et al.*, 2011 CREST maps somatic structural variation in cancer genomes with base-pair resolution. *Nat. Methods* **8**: 652-654.
- Zaragoza, O., B. C. Fries, and A. Casadevall, 2003 Induction of capsule growth in *Cryptococcus neoformans* by mammalian serum and CO<sub>2</sub>. *Infect. Immun.* **71**: 6155-6164.

**Table S1A Indels identified between H99 and F0 and F2 within genes with functional annotation**

| Chr | H99                | F0 & F2        | Gene       | Gene function                                 | Effect of mutation on protein                    |
|-----|--------------------|----------------|------------|-----------------------------------------------|--------------------------------------------------|
| 1   | T                  | TCCCACA        | CNAG_00545 | IDN3-B                                        | Insertion of PH in 5x string at 259 (of 1,933)   |
| 1   | T                  | TGGTTCA        | CNAG_00619 | tubulin folding cofactor C                    | Insertion of EP in 4x string at 224 (of 356)     |
| 3   | GTTC               | G              | CNAG_02824 | uncharacterized ACR, COG1565                  | Deletion of R11 (of 543)                         |
| 3   | GCAT               | G              | CNAG_02796 | phospho-2-dehydro-3-deoxyheptonate aldolase   | Deletion of S in 7x string at 281 (of 544)       |
| 3   | AGA                | AC             | CNAG_07527 | $\alpha$ -1,6-mannosyl transferase            | H232E, truncation at 250 (of 518)                |
| 3   | A                  | AAGAAGC        | CNAG_07580 | CAMK/CAMKL/MARK protein kinase                | Insertion of AS in 3x string at 513 (of 1,172)   |
| 3   | GATCGTC            | G              | CNAG_06888 | cytoplasmic protein                           | Deletion of SS in 5x string at 414 (1,037)       |
| 3   | AG                 | A              | CNAG_06888 | cytoplasmic protein                           | G1024A (of 1,037)                                |
| 3   | A                  | ACAAGCC        | CNAG_06920 | ubiquitin-specific protease                   | Insertion of AQ in 3x string at 276 (of 1,109)   |
| 3   | GAGA               | G              | CNAG_06920 | ubiquitin-specific protease                   | Deletion of K501 (of 1,109)                      |
| 3   | C                  | CCTT           | CNAG_06927 | peptidyl-prolyl cis-trans isomerase           | Insertion of E480 (of 513)                       |
| 4   | A                  | ATGATGAAG<br>G | CNAG_05096 | histone deacetylase 3                         | Insertion of SSP151 (of 490)                     |
| 4   | G                  | GGTT           | CNAG_05138 | exo- $\beta$ -1,3-glucanase                   | Insertion of N37 (of 785)                        |
| 4   | C                  | CCAGAAA        | CNAG_05248 | clathrin binding protein                      | Insertion of KQ738 (of 751)                      |
| 4   | G                  | GT             | CNAG_05274 | STE/STE20/YSK protein kinase                  | G727V, truncation at 727 (of 765)                |
| 5   | TA                 | T              | CNAG_00974 | beta-lactamase domain-containing protein      | C188Stop (of 300)                                |
| 7   | G                  | GATGGA         | CNAG_06533 | ATP-dependent permease                        | Insertion of NGNG in 2x string at 648 (of 1,051) |
| 7   | AAAGAGACA<br>TACGT | A              | CNAG_06556 | oxidoreductase                                | Q242R, truncation at 260 (of 323)                |
| 7   | TC                 | T              | CNAG_06623 | <i>myo</i> -inositol oxygenase                | S124L, truncation at 151 (of 315)                |
| 8   | TCCCGCCACC         | T              | CNAG_03189 | DIL and ankyrin domain-containing protein     | G1093D (of 1,105)                                |
| 8   | TGTC               | T              | CNAG_03321 | vacuolar protein sorting-associated protein 9 | Deletion of T in 7x string at 131 (of 714)       |
| 8   | TG                 | T              | CNAG_03339 | biotin transporter                            | H439P, truncation at 458 (of 503)                |
| 8   | AG                 | ATA            | CNAG_03519 | cytoplasmic protein                           | Q453H, truncation at 459 (of 502)                |

| Chr | H99               | F0 & F2        | Gene       | Gene function                                                    | Effect of mutation on protein                 |
|-----|-------------------|----------------|------------|------------------------------------------------------------------|-----------------------------------------------|
| 8   | TC                | T              | CNAG_03533 | JmjC domain-containing histone demethylation protein 1           | A505G, truncation at 557 (of 874)             |
| 9   | A                 | AACC           | CNAG_04213 | signal transducer                                                | Insertion of G152 (of 978)                    |
| 9   | A                 | AAGC           | CNAG_04380 | peptidase                                                        | Insertion of S in 6x string at 250 (of 688)   |
| 10  | T                 | TAGA           | CNAG_04792 | phosphatidyl serine decarboxylase                                | Insertion of E in 4x string at 340 (of 1,230) |
| 10  | G                 | GA             | CNAG_04696 | DNA clamp loader                                                 | S438F, truncation at 444 (of 760)             |
| 11  | A                 | ACGGTGATG<br>G | CNAG_01809 | small nuclear ribonucleoprotein hPrp3                            | Insertion of GGD501 (of 590)                  |
| 11  | TCAACTCCAA<br>CTC | T              | CNAG_02000 | short-chain dehydrogenase                                        | Deletion of SNSN in 3x string at 40 (of 358)  |
| 11  | AG                | A              | CNAG_02016 | DUF1479 domain-containing protein                                | V158L, truncation at 196 (of 493)             |
| 12  | ACAG              | A              | CNAG_06193 | CMGC/RCK protein kinase                                          | Deletion of Q in 5x string at 94 (of 1,262)   |
| 13  | A                 | AC             | CNAG_06499 | phosphatidic acid phosphatase type 2 domain containing 1 protein | C252V, truncation at 297 (of 382)             |

**Table S1B Structural variation identified between H99 and F0 and F2**

| Chr | Type                  | Size (bp) | Gene                               | Gene name                                              |
|-----|-----------------------|-----------|------------------------------------|--------------------------------------------------------|
| 1   | Deletion              | 3,407     | CNAG_00549                         | hypothetical protein                                   |
| 2   | Deletion              | 47        | CNAG_03991                         | integral membrane protein                              |
| 2   | Insertion             | 656       | CNAG_04003 (intron)                | pumilio 2                                              |
| 3   | Deletion              | 383       |                                    |                                                        |
| 3   | Deletion              | 3,409     | CNAG_02711                         | hypothetical protein                                   |
| 3   | Deletion              | 150       | CNAG_02706, CNAG_02707             | hypothetical proteins                                  |
| 4   | Deletion              | 539       |                                    |                                                        |
| 4   | Deletion              | 557       | CNAG_05266 (intron)                | membrane protein                                       |
| 5   | Deletion              | 302       | CNAG_06863                         | hypothetical protein                                   |
| 5   | Deletion              | 716       | CNAG_06843                         | hypothetical protein                                   |
| 5   | Deletion              | 7,459     | CNAG_01367, CNAG_01368             | hypothetical proteins                                  |
| 5   | Deletion              | 475       |                                    |                                                        |
| 5   | Deletion              | 1,413     | CNAG_01032                         | hypothetical protein                                   |
| 6   | Deletion              | 260       |                                    |                                                        |
| 6   | Insertion             | 664       |                                    |                                                        |
| 7   | Tandem duplication    | 643       | CNAG_06557                         | membrane protein                                       |
| 7   | Deletion              | 323       |                                    |                                                        |
| 7   | Insertion/duplication | 7,464     | CNAG_00813/01368, CNAG_00814/01367 | hypothetical proteins                                  |
| 7   | Deletion              | 7,155     | CNAG_05911, CNAG_05910             | hypothetical proteins                                  |
| 7   | Insertion/duplication | 9,600     | CNAG_07313, CNAG_00127, CNAG_00128 | hypothetical proteins                                  |
| 8   | Insertion             | 1,033     | CNAG_07707                         | glycoside hydrolase family 3 domain-containing protein |
| 8   | Insertion             | 915       | CNAG_03195                         | hypothetical protein                                   |
| 8   | Deletion              | 114       |                                    |                                                        |
| 8   | Deletion              | 7,132     | CNAG_03477, CNAG_03478             | hypothetical proteins                                  |
| 8   | Deletion              | 99        |                                    |                                                        |
| 10  | Deletion              | 556       | CNAG_07836 (intron)                | NAD binding dehydrogenase family protein               |
| 10  | Insertion             | 402       |                                    |                                                        |
| 10  | Insertion             | 432       | CNAG_04901                         | hypothetical protein                                   |
| 10  | Insertion             | 664       |                                    |                                                        |
| 10  | Deletion              | 5,210     |                                    |                                                        |
| 10  | Deletion              | 246       |                                    |                                                        |
| 11  | Deletion              | 7,427     | CNAG_07613, CNAG_01968             | hypothetical proteins                                  |
| 13  | Deletion              | 77        | CNAG_06336                         | glucan 1,3 beta-glucosidase                            |
| 13  | Deletion              | 15        |                                    |                                                        |
| 14  | Deletion              | 591       |                                    |                                                        |

---

|           |          |     |            |                      |
|-----------|----------|-----|------------|----------------------|
| <b>14</b> | Deletion | 165 |            |                      |
| <b>14</b> | Deletion | 248 |            |                      |
| <b>14</b> | Deletion | 85  |            |                      |
| <b>14</b> | Deletion | 592 | CNAG_07874 | sugar transporter    |
| <b>14</b> | Deletion | 11  | CNAG_05643 | hypothetical protein |

---



**Table S2 Genes on the left arm of chromosome 12**

| <b>Strand</b> | <b>Locus</b> | <b>Length</b> | <b>Start</b> | <b>Stop</b> | <b>Name</b>                                                  |
|---------------|--------------|---------------|--------------|-------------|--------------------------------------------------------------|
| -             | CNAG_06939   | 1,938         | 204          | 2,141       | conserved hypothetical protein                               |
| -             | CNAG_06938   | 432           | 4,923        | 5,354       | conserved hypothetical protein                               |
| -             | CNAG_07026   | 670           | 7,207        | 7,876       | conserved hypothetical protein                               |
| +             | CNAG_07894   | 287           | 9,950        | 10,236      | conserved hypothetical protein                               |
| -             | CNAG_05986   | 1,052         | 12,447       | 13,498      | conserved hypothetical protein                               |
| -             | CNAG_05987   | 1,083         | 13,917       | 14,999      | conserved hypothetical protein                               |
| -             | CNAG_05988   | 580           | 15,532       | 16,111      | conserved hypothetical protein                               |
| +             | CNAG_05989   | 1,900         | 17,145       | 19,044      | predicted protein                                            |
| -             | CNAG_05990   | 2,564         | 19,424       | 21,987      | predicted protein                                            |
| +             | CNAG_05991   | 1,886         | 22,684       | 24,569      | glycosyl hydrolase family 88                                 |
| +             | CNAG_05992   | 2,338         | 25,550       | 27,887      | conserved hypothetical protein                               |
| -             | CNAG_05993   | 2,668         | 27,970       | 30,637      | transmembrane transporter Liz1                               |
| +             | CNAG_05994   | 2,256         | 31,431       | 33,686      | multidrug transporter                                        |
| -             | CNAG_05995   | 2,215         | 34,421       | 36,635      | conserved hypothetical protein                               |
| +             | CNAG_05996   | 3,075         | 38,318       | 41,392      | amino acid transporter                                       |
| -             | CNAG_05997   | 849           | 42,493       | 43,341      | conserved hypothetical protein                               |
| +             | CNAG_05998   | 1,353         | 43,606       | 44,958      | rho GTPase                                                   |
| -             | CNAG_05999   | 974           | 45,350       | 46,323      | peptide alpha-N-acetyltransferase                            |
| +             | CNAG_06000   | 1,986         | 46,804       | 48,789      | glycoprotein                                                 |
| +             | CNAG_06001   | 1,923         | 49,240       | 51,162      | phosphomevalonate kinase                                     |
| -             | CNAG_06002   | 1,752         | 51,476       | 53,227      | tRNA (5-methylaminomethyl-2-thiouridylate)-methyltransferase |
| +             | CNAG_06003   | 912           | 54,177       | 55,088      | conserved hypothetical protein                               |
| -             | CNAG_06004   | 1,440         | 55,430       | 56,869      | conserved hypothetical protein                               |
| +             | CNAG_06005   | 3,065         | 57,220       | 60,284      | conserved hypothetical protein                               |
| -             | CNAG_06006   | 1,542         | 60,590       | 62,131      | conserved hypothetical protein                               |
| +             | CNAG_06007   | 1,057         | 62,416       | 63,472      | hypothetical protein                                         |
| +             | CNAG_06008   | 1,378         | 63,801       | 65,178      | asparaginase                                                 |
| +             | CNAG_06009   | 2,427         | 65,715       | 68,141      | cyclohydrolase                                               |
| -             | CNAG_07895   | 402           | 70,290       | 70,691      | predicted protein                                            |
| -             | CNAG_06010   | 2,541         | 71,423       | 73,963      | fatty aldehyde dehydrogenase                                 |
| +             | CNAG_06011   | 2,097         | 74,927       | 77,023      | conserved hypothetical protein                               |
| -             | CNAG_06012   | 1,508         | 77,134       | 78,641      | NADH-cytochrome b5 reductase                                 |
| +             | CNAG_06013   | 2,116         | 78,850       | 80,965      | vacuolar protein                                             |
| -             | CNAG_06014   | 891           | 81,022       | 81,912      | predicted protein                                            |
| -             | CNAG_06015   | 651           | 81,943       | 82,593      | predicted protein                                            |
| -             | CNAG_07896   | 702           | 83,434       | 84,135      | predicted protein                                            |
| -             | CNAG_06016   | 2,025         | 85,492       | 87,516      | capsule associated protein 6                                 |
| +             | CNAG_06017   | 573           | 88,620       | 89,192      | predicted protein                                            |
| +             | CNAG_06018   | 2,421         | 89,818       | 92,238      | aldehyde dehydrogenase                                       |
| +             | CNAG_06019   | 5,653         | 93,866       | 99,518      | conserved hypothetical protein                               |

| Strand | Locus      | Length | Start   | Stop    | Name                                         |
|--------|------------|--------|---------|---------|----------------------------------------------|
| -      | CNAG_06020 | 1,738  | 100,066 | 101,803 | conserved hypothetical protein               |
| +      | CNAG_06021 | 2,681  | 103,158 | 105,838 | rab GTPase activator                         |
| -      | CNAG_06022 | 1,429  | 105,986 | 107,414 | trans-aconitate 3-methyltransferase          |
| +      | CNAG_06023 | 678    | 107,717 | 108,394 | conserved hypothetical protein               |
| -      | CNAG_06024 | 1,294  | 108,487 | 109,780 | peroxin 14                                   |
| +      | CNAG_06026 | 2,187  | 110,990 | 113,176 | aspartate transaminase                       |
| -      | CNAG_06027 | 2,064  | 112,960 | 115,023 | aryl-alcohol dehydrogenase                   |
| -      | CNAG_06028 | 1,242  | 116,243 | 117,484 | conserved hypothetical protein               |
| +      | CNAG_06029 | 741    | 117,802 | 118,542 | conserved hypothetical protein               |
| -      | CNAG_06030 | 1,968  | 118,609 | 120,576 | conserved hypothetical protein               |
| +      | CNAG_06031 | 1,177  | 122,495 | 123,671 | $\beta$ -glucan synthesis-associated protein |
| +      | CNAG_06032 | 948    | 124,300 | 125,247 | ADP-ribosylation factor-like protein 2       |
| -      | CNAG_06033 | 1,661  | 125,368 | 127,028 | pfkB family carbohydrate kinase superfamily  |
| +      | CNAG_06034 | 2,158  | 131,492 | 133,649 | allantoin permease                           |
| -      | CNAG_06035 | 1,814  | 134,163 | 135,976 | alcohol dehydrogenase                        |
| +      | CNAG_06036 | 2,651  | 136,817 | 139,467 | aminotransferase LoIT-1                      |

**Table S3 Statistical parameters of multivariate PCA models of metabolomic data**

| <b>Model</b> | <b>N</b> | <b>k</b> | <b>A</b> | <b>R<sup>2</sup>X</b> | <b>Q<sup>2</sup></b> | <b>Scaling</b> | <b>Comparison</b>        | <b>Figure</b> |
|--------------|----------|----------|----------|-----------------------|----------------------|----------------|--------------------------|---------------|
| <b>M1</b>    | 34       | 9151     | 6        | 0.919                 | 0.85                 | Pareto         | All samples              | 3A            |
| <b>M2</b>    | 11       | 9151     | 3        | 0.876                 | 0.698                | Pareto         | F0 vs. F2 in YNB medium  | 3B & C        |
| <b>M3</b>    | 11       | 9151     | 2        | 0.936                 | 0.889                | Centre         | F0 vs. F2 in YNB medium  | 3B & C        |
| <b>M4</b>    | 12       | 9151     | 3        | 0.785                 | 0.458                | Pareto         | F0 vs. F2 in YPD medium  | S5A & B       |
| <b>M5</b>    | 12       | 9151     | 5        | 0.98                  | 0.866                | Centre         | F0 vs. F2 in YPD medium  | S5A & B       |
| <b>M6</b>    | 12       | 9151     | 4        | 0.916                 | 0.826                | Pareto         | F2 in YNB vs. YPD medium | S5C & D       |
| <b>M7</b>    | 12       | 9151     | 3        | 0.986                 | 0.961                | Centre         | F2 in YNB vs. YPD medium | S5C & D       |
| <b>M8</b>    | 11       | 9151     | 3        | 0.848                 | 0.545                | Pareto         | F0 in YNB vs. YPD medium | S5E & F       |
| <b>M9</b>    | 11       | 9151     | 2        | 0.838                 | 0.567                | Centre         | F0 in YNB vs. YPD medium | S5E & F       |

N= number of samples, k= number of x-variables (buckets), A= number of principal components in the model, R<sup>2</sup>X=sum of squares of all x-variables explained by the model, Q<sup>2</sup>= cumulative cross-validated R<sup>2</sup>.

**Table S4 Primers used in this study**

| <b>Primer ID</b> | <b>Sequence</b>       |
|------------------|-----------------------|
| UQ623            | CAGGTCAAGGAAAGGCAACAG |
| UQ624            | TGCCCTGAAGTTGGTTAGACT |
| UQ702            | ACAAAATCCACGCATACAGAA |
| UQ703            | CGCCACCATCCAAACGTCAA  |
| UQ704            | CAATCCCTTTGCCATCTGAAC |
| UQ705            | GGTCAACCGCCTGTTTCTAAT |
| UQ706            | CCCATATTATCCCAATCTGA  |
| UQ707            | CCTGCATTGTTGCCTCTCTA  |
| UQ708            | GCGTGGCCGACCTTACCTCAG |
| UQ709            | CCAATACACCAACAGCGTGAC |
| UQ801            | GCGAAAGGGTGAGAAGTGA   |
| UQ802            | CACTAAAGGGCGGCCATTAAA |
| UQ1836           | AGCTCTACCCACTACCGAATC |
| UQ1837           | CGACGATGACTCCCACTACCA |
| UQ1838           | CACCTGGAGAAGTTCGCTGAG |
| UQ1839           | GGCTGAACATTGTCGCTTATT |
| UQ1840           | TGTGGGATGAATGTAAGTCT  |
| UQ1842           | GGACTTTGCTTCGGATGATCT |
| UQ1843           | CACATGCTCGCTTAGTTGC   |
| UQ1844           | TATCAGCGAAATACGACAAGG |
| UQ1845           | GCTAGTCACAGGTCGTCGGT  |
| UQ1846           | GCACTTCCAACGCAGGTT    |
| UQ1847           | CGCTCTTGCTTTGACCAACTC |
| UQ1848           | TTGCAATGACAAAAGGCTTAT |
| UQ1849           | TGCTCTCCCACTTCGATT    |
| UQ1850           | CGGCAGGTTTCGATATGG    |
| UQ1851           | TGTTGTTGTTGCGTAGTCGTC |
| UQ1852           | CAGGCTAGTGAGTCGGCTACA |
| UQ1853           | CGGGGAATTCGATCATC     |
| UQ1854           | CTCCTCGCACGGTTCTC     |
| UQ1855           | TGGAGGCTCGTGACATATGAA |
| UQ1856           | AGCCATTTCTTTCAGTCGAGC |
| UQ1857           | GGGGTTTGATTGGTGCAAG   |
| UQ1858           | CCTCCGTCCTCCGAGTCGTT  |
| UQ1859           | GGAAGAAATTGGGTAAGCC   |
| UQ1860           | AAACATGTCTACCGTTGACCC |
| UQ1861           | CGGAGGTGAAATAGAACGC   |
| UQ1862           | CCCTTATCCAAGATTCCGTGA |
| UQ1865           | CGGCATAGAGAACGGGAAG   |
| UQ1866           | ACGCTTTCAGACCCTCGTTCT |
| UQ1869           | TCTTGAATCTGCGAGCGTGAA |
| UQ1870           | CACCGAAAGAAGCGTCTAAAC |
| UQ1873           | CTTCTCCATCCATGCTGACA  |
| UQ1874           | CGGCCTCATGATGTTAAGT   |
| UQ1877           | CGGCATAGAGAACGGGAAG   |
| UQ1878           | GTACCGTAGTGCGCTGA     |
| UQ1881           | AGCCGACGACGAAGTTCA    |
| UQ1882           | CACAAAGACCTTGCCATTATG |
| UQ1885           | CAAAAAAAGATTCTCCCTCC  |
| UQ1886           | CCCTGAACCAGCCGTCT     |
| UQ1889           | GTATTGGAGGCACGGCAGA   |

| Primer ID | Sequence                                       |
|-----------|------------------------------------------------|
| UQ1894    | GGCGATGGTAAAGATGATAGC                          |
| UQ1897    | CTCTCAAGAAGACGCTGACTT                          |
| UQ1898    | GGCCTGGTGTGCGTATTG                             |
| UQ1899    | CGCATCCTTCAATGACATTGG                          |
| UQ1902    | GTCATCCGCAACTCATATCA                           |
| UQ1903    | TGCTGTAGCGTCTGCGTGTGA                          |
| UQ1904    | TCAAGCGAACTTAAAGGGTAA                          |
| UQ1905    | AGGCGTTGGACTTCGAC                              |
| UQ1906    | CCATACTTTTTGCCGTTTAC                           |
| UQ1907    | GGCCCAGGAGGTGATCAATTT                          |
| UQ1908    | CGCGCCTTTCCTATCTC                              |
| UQ1909    | GATGTGGGAATGACGGGAGTC                          |
| UQ1910    | GAAATGTTCCCGTGTGTCAT                           |
| UQ1911    | CGAAATTGTTGCCGATTG                             |
| UQ1986    | GGAGGTGGACTGTATTGTGAG                          |
| UQ1987    | CAATAATATCGTCTCGGGTGG                          |
| UQ1990    | CGATGGATTTTAACCGTGACT                          |
| UQ1991    | CCCGTATTTCAAACACTCTCA                          |
| UQ1994    | CAGGGCACGAAAGGGACAGGT                          |
| UQ1995    | GGGAAGTGATTGAGCATTTTT                          |
| UQ1998    | CGACGGCTGAAGAACAAGGTG                          |
| UQ1999    | ATCCGTAATCATTGCCAACAC                          |
| UQ2000    | GCTCGCACTTCACTACTTTC                           |
| UQ2001    | GTTGTGCTGGCTGCTGTTGTT                          |
| UQ2004    | GCCCAAGGAAGGAAAGCTCAA                          |
| UQ2005    | GGCTTGAGGCCAAAAGACGACA                         |
| UQ2006    | GGTGGACGAGAAGGATGAAAA                          |
| UQ2007    | CGTCAGACCTAGCGTTTACTT                          |
| UQ2008    | CTGCCAGTTATGAGCTGTCCG                          |
| UQ2009    | TGCTTGATGTTGTCGCATT                            |
| UQ2010    | TGGGGGACAGGGATGCACGGA                          |
| UQ2011    | AAAGGCAAGTCACGTCGAAAA                          |
| UQ2012    | AAGAAGTCGATCTCCGCTCA                           |
| UQ2013    | TAGGCTTCACTGACACACAAA                          |
| UQ2014    | ATAAAAACCGCCAGGTCTGC                           |
| UQ2015    | CCTACTTCTGTAGTAGCTGG                           |
| UQ2016    | ACAGGGAAATGCTAAAAGTAT                          |
| UQ2017    | AAGTTCGGGTA CTGCTCTC                           |
| UQ2018    | CACTTACTCGCCAGTCCACCA                          |
| UQ2023    | CAGTGAGCCATCCTTACAGTC                          |
| UQ2024    | AAACGATGATGCTGGAATTAC                          |
| UQ2025    | CTGAGCATAATAATGGCGTCC                          |
| UQ2026    | GAGATAAGGTCATCGCAAAC                           |
| UQ2072    | TGTACGAAGGCTATGAAGCTG                          |
| UQ2073    | GATGGCGTGTACTGTACTCT                           |
| UQ2074    | TCACCGCTCGCTAAACCTGTT                          |
| UQ2075    | CTAGGGTTTGGACGCACAACT                          |
| UQ2076    | GGATACCAGCAATTCCTCCA                           |
| UQ2087    | TCTCAGATCCTTCCCTTTGTC                          |
| UQ2088    | CGCTCTCCAGCTCACATCCTCGCAGCTGAAACAGGATGT        |
| UQ2089    | CTACATCTTCCGTGTTAATACAGATAAACCGATGGTGGATGAGCTT |
| UQ2090    | CTTTTTCGTTCAATCCTGCTT                          |
| UQ2091    | ACATCCTGTTTCAGCTGCGAGGATGTGAGCTGGAGAGCG        |

| Primer ID | Sequence                                         |
|-----------|--------------------------------------------------|
| UQ2092    | AAGCTCATCCACCATCGGTTTATCTGTATTAACACGGAAGAGATGTAG |
| UQ2093    | CCGGAAGAGTGCTTGCAGATT                            |
| UQ2094    | TTCGCCTCTGGACCGTGAATG                            |
| UQ2095    | ACTTGAGCATTTGCGGGTGTG                            |
| UQ2096    | TTCCAGCACCAGCGTTCTTG                             |
| UQ2097    | TGCTGACTGGGCCCTTGCCT                             |
| UQ2098    | GTGCGCATGAATTCGTGGACT                            |
| UQ2099    | CAAACCCCTTCCCGGACGACT                            |
| UQ2156    | CTAGGAATGAACATGGGAATG                            |
| UQ2157    | TAGTTTGTAGTTGACCGGTT                             |
| UQ2158    | AGTGCACGAGTTATTGAAGA                             |
| UQ2159    | CAGAAAGATCGAGAGAAACAG                            |
| UQ2160    | TAAATCTTGTCGTTGGGGTC                             |
| UQ2263    | AAATGCAGCGGAACCAAATC                             |
| UQ2264    | AGAGCTAAGTTAAATGGGGGG                            |
