# Supplementary material for: Comparative Genomics of Serial Isolates of Cryptococcus neoformans Reveals Gene Associated With Carbon Utilization and Virulence
Source: PubMed Central journal article supplement (PMC3618354; doi:10.1534/g3.113.005660), 2013-04-01
Supplement: supp_g3.113.005660_FigureS1.pdf [file supp_g3.113.005660_FigureS1.pdf]

(A)

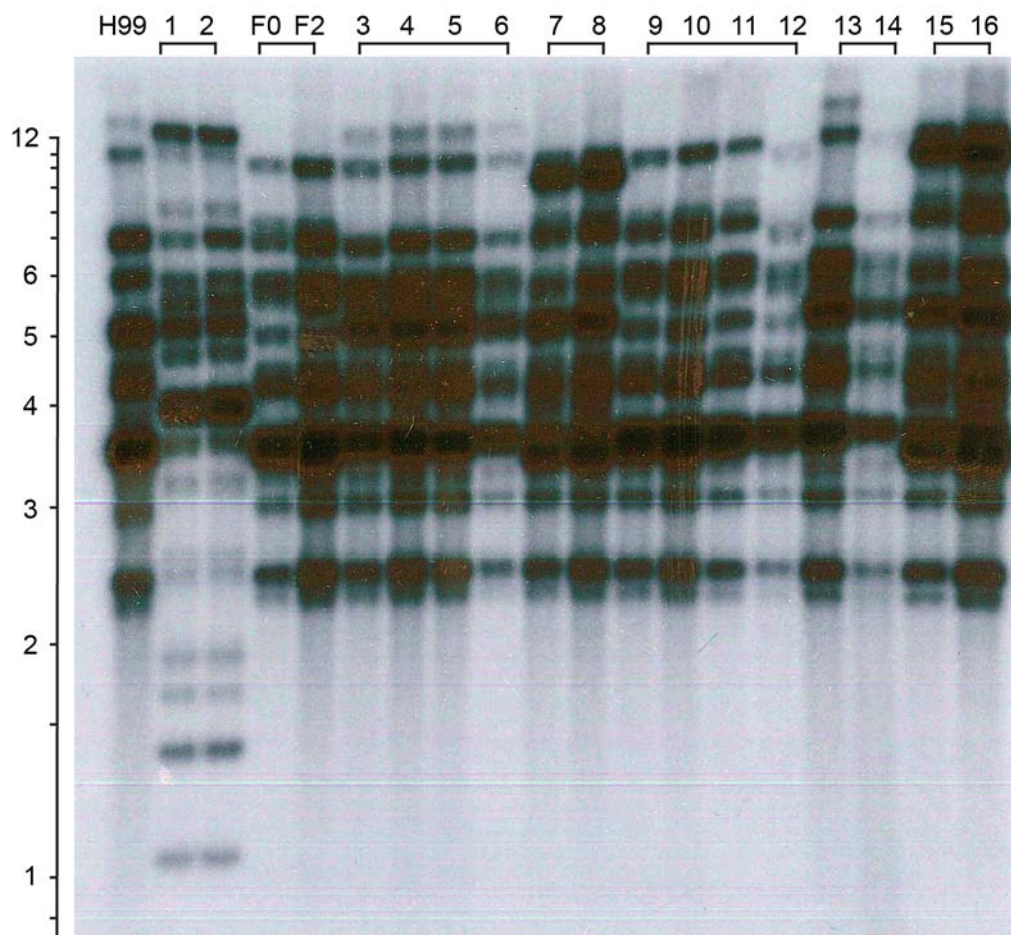

(B)

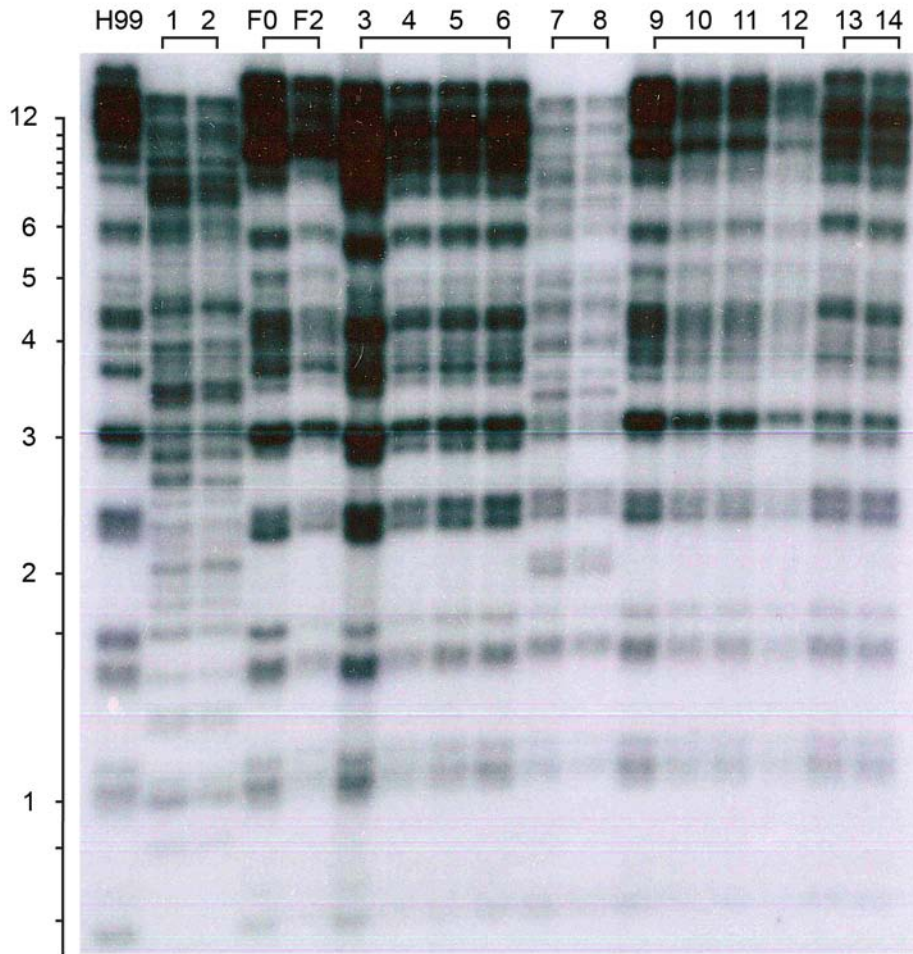

(C)

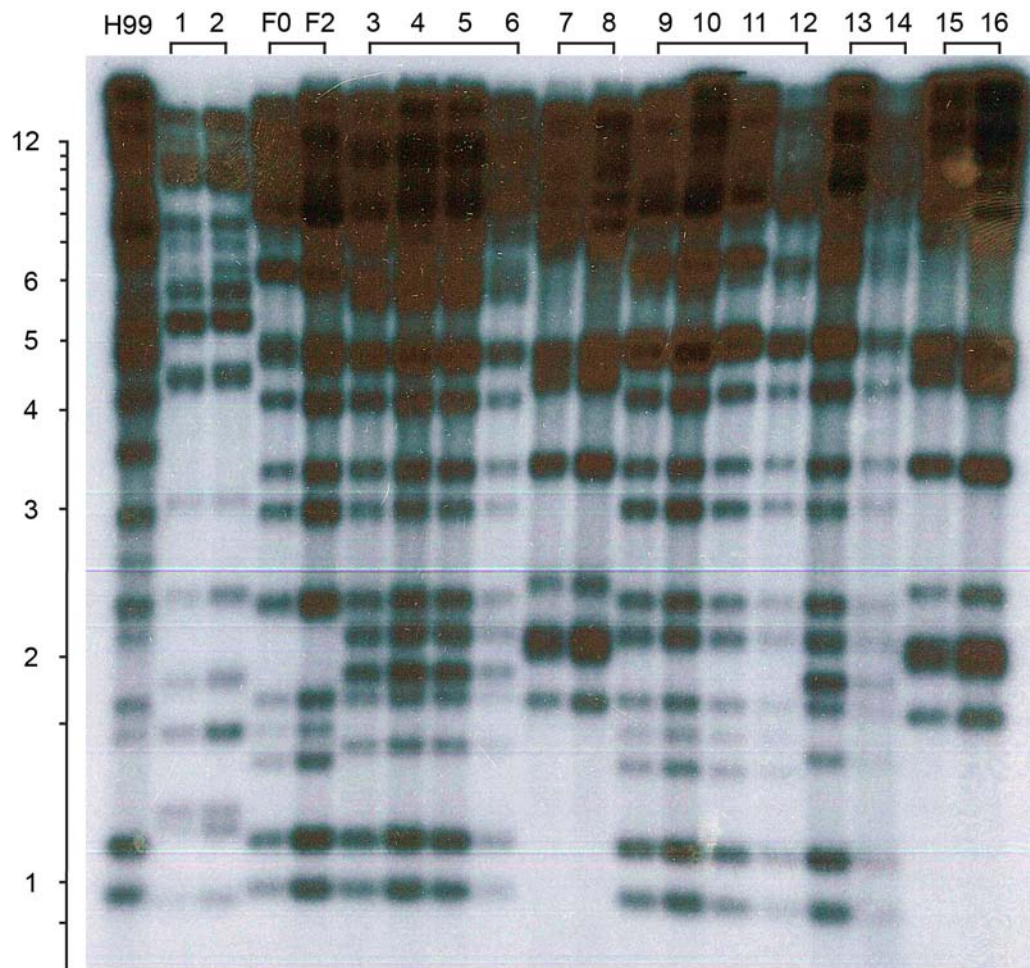

(D)

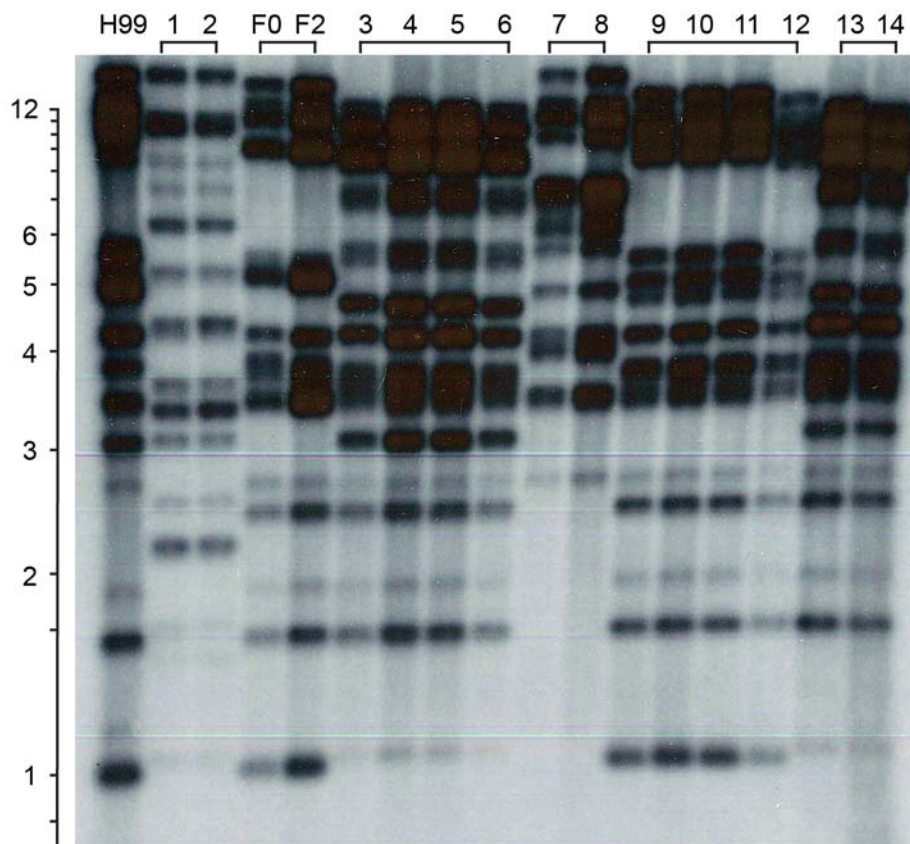

(E)

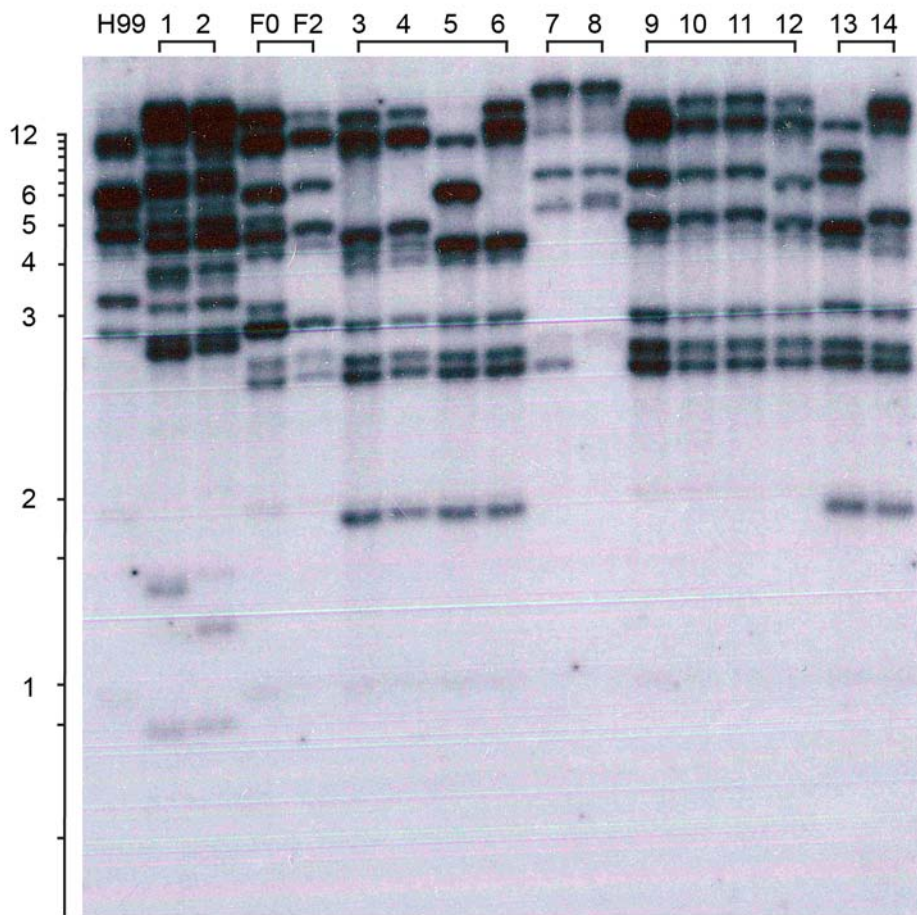

(F)

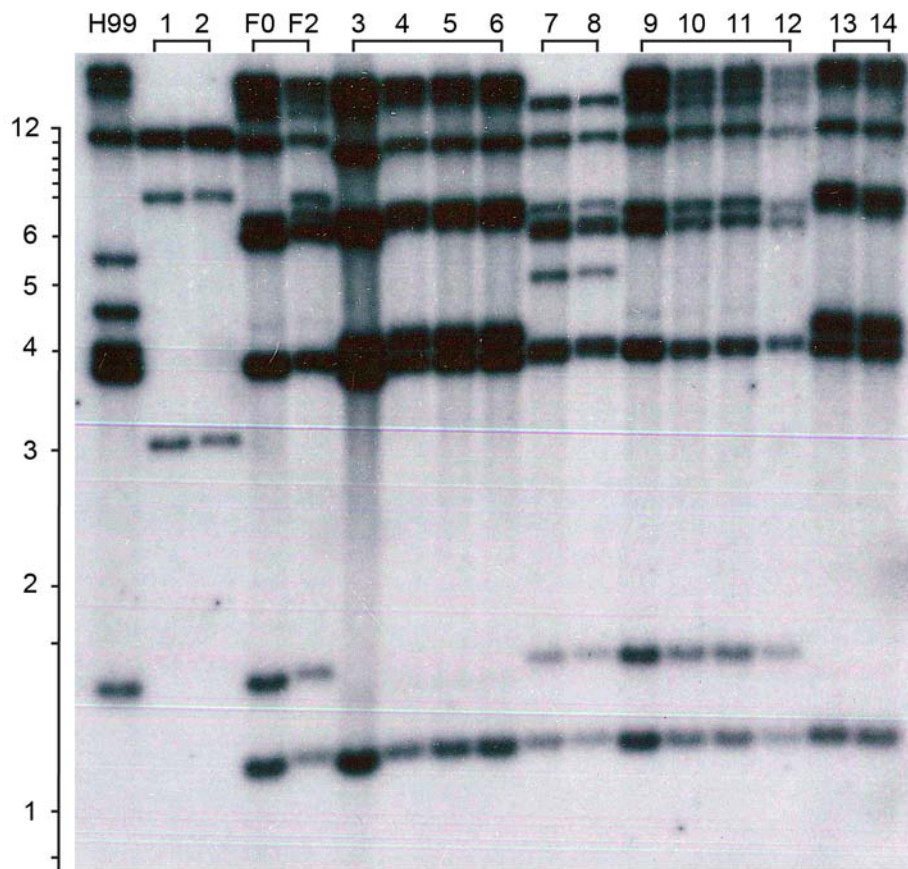

**FIGURE S1** Transposon profiles of F0 and F2 are the same for Cnirt2, Tcn1, Tcn2 and Tcn4 but different for Tcn6, a highly mobile transposon. Southern blot analysis of serial isolates (sets marked with rectangles) probed with transposon fragments of (A) Cnirt2, (B) Tcn1, (C) Tcn2, (D) Tcn4, (E) Tcn6 internal region, (F) Tcn6 LTR. Strains 1 to 16 are serial clinical isolates that have not as yet been characterized.
