# Supplementary material for: Comparative Genomics of Serial Isolates of Cryptococcus neoformans Reveals Gene Associated With Carbon Utilization and Virulence
Source: PubMed Central journal article supplement (PMC3618354; doi:10.1534/g3.113.005660), 2013-04-01
Supplement: supp_g3.113.005660_FigureS3.pdf [file supp_g3.113.005660_FigureS3.pdf]

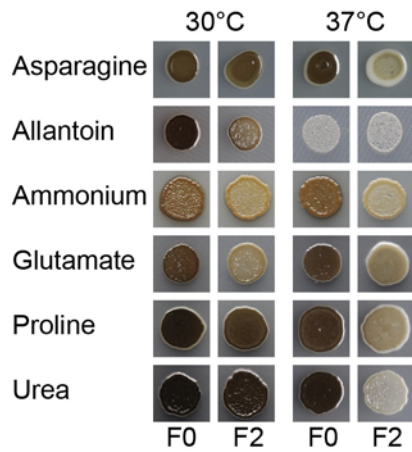

**FIGURE S3 Melanin production in F2 is reduced on multiple nitrogen sources.** When grown on L-DOPA containing *Cryptococcus* melanization media supplemented with various nitrogen sources, F2 exhibits a significant melanization defect at 37°, also visible on many nitrogen sources at 30°.
