# Supplementary material for: Comparative Genomics of Serial Isolates of Cryptococcus neoformans Reveals Gene Associated With Carbon Utilization and Virulence
Source: PubMed Central journal article supplement (PMC3618354; doi:10.1534/g3.113.005660), 2013-04-01
Supplement: supp_g3.113.005660_FigureS4.pdf [file supp_g3.113.005660_FigureS4.pdf]

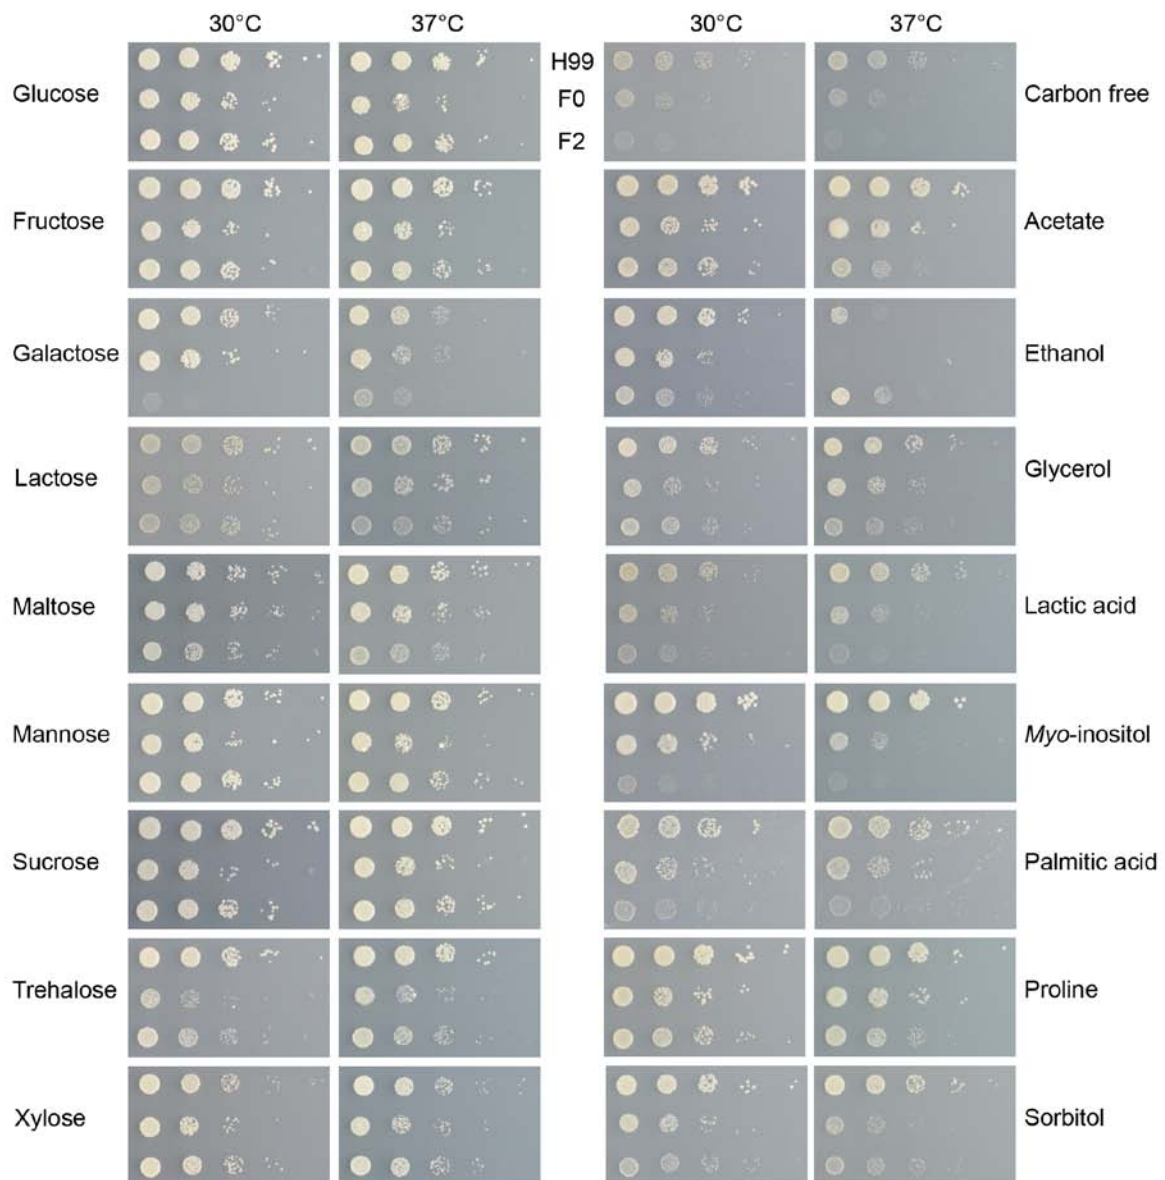

**FIGURE S4 F0 and F2 exhibit different growth on alternate carbon sources.** 10-fold serial dilutions of indicated strains were spotted onto minimal media supplemented with various carbon sources and incubated at 30 and 37° for 2 to 3 days.
