# Supplementary material for: Comparative Genomics of Serial Isolates of Cryptococcus neoformans Reveals Gene Associated With Carbon Utilization and Virulence
Source: PubMed Central journal article supplement (PMC3618354; doi:10.1534/g3.113.005660), 2013-04-01
Supplement: supp_g3.113.005660_FigureS5.pdf [file supp_g3.113.005660_FigureS5.pdf]

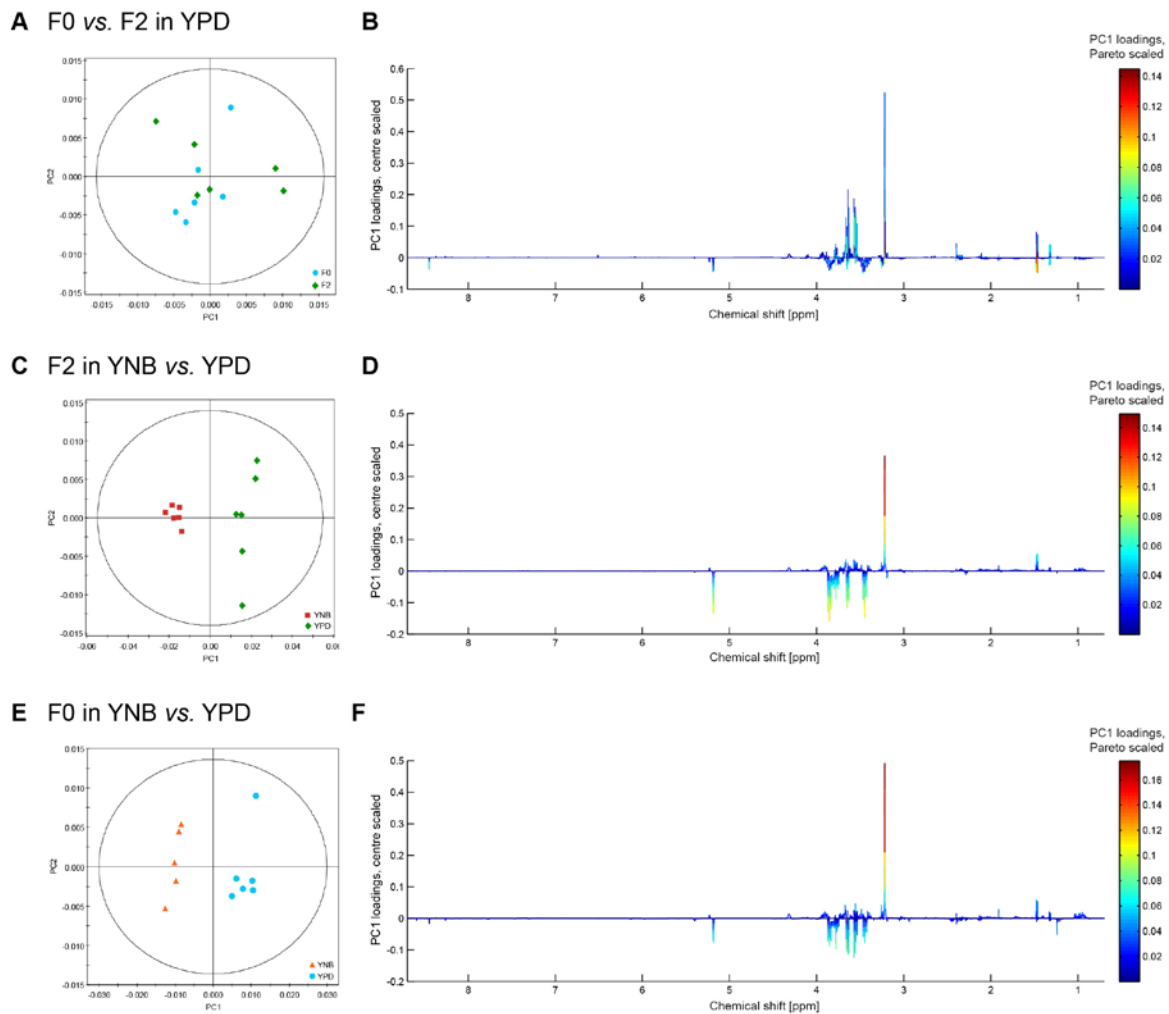

**FIGURE S5** Pairwise comparisons of metabolic profiles with principal components analysis. (A) & (B) Comparison of F0 (cyan circles) with F2 (green diamonds) in YPD medium. (C) & (D) Comparison between F2 in YNB (red squares) and YPD (green diamonds) medium. (E) & (F) Comparison between F0 in YNB (orange triangles) and YPD (cyan circles) medium. (A), (C) & (E): Principal components analysis scores plots. Hotelling's 95% confidence range of the PCA model is indicated in the scores plots by an ellipse. (B), (D) & (F): Bivariate loadings plot with center scaled loadings coefficients shown as intensity, and Pareto scaled coefficients as heatmap.
