# Supplementary material for: Comparative Genomics of Serial Isolates of Cryptococcus neoformans Reveals Gene Associated With Carbon Utilization and Virulence
Source: PubMed Central journal article supplement (PMC3618354; doi:10.1534/g3.113.005660), 2013-04-01
Supplement: supp_g3.113.005660_FigureS6.pdf [file supp_g3.113.005660_FigureS6.pdf]

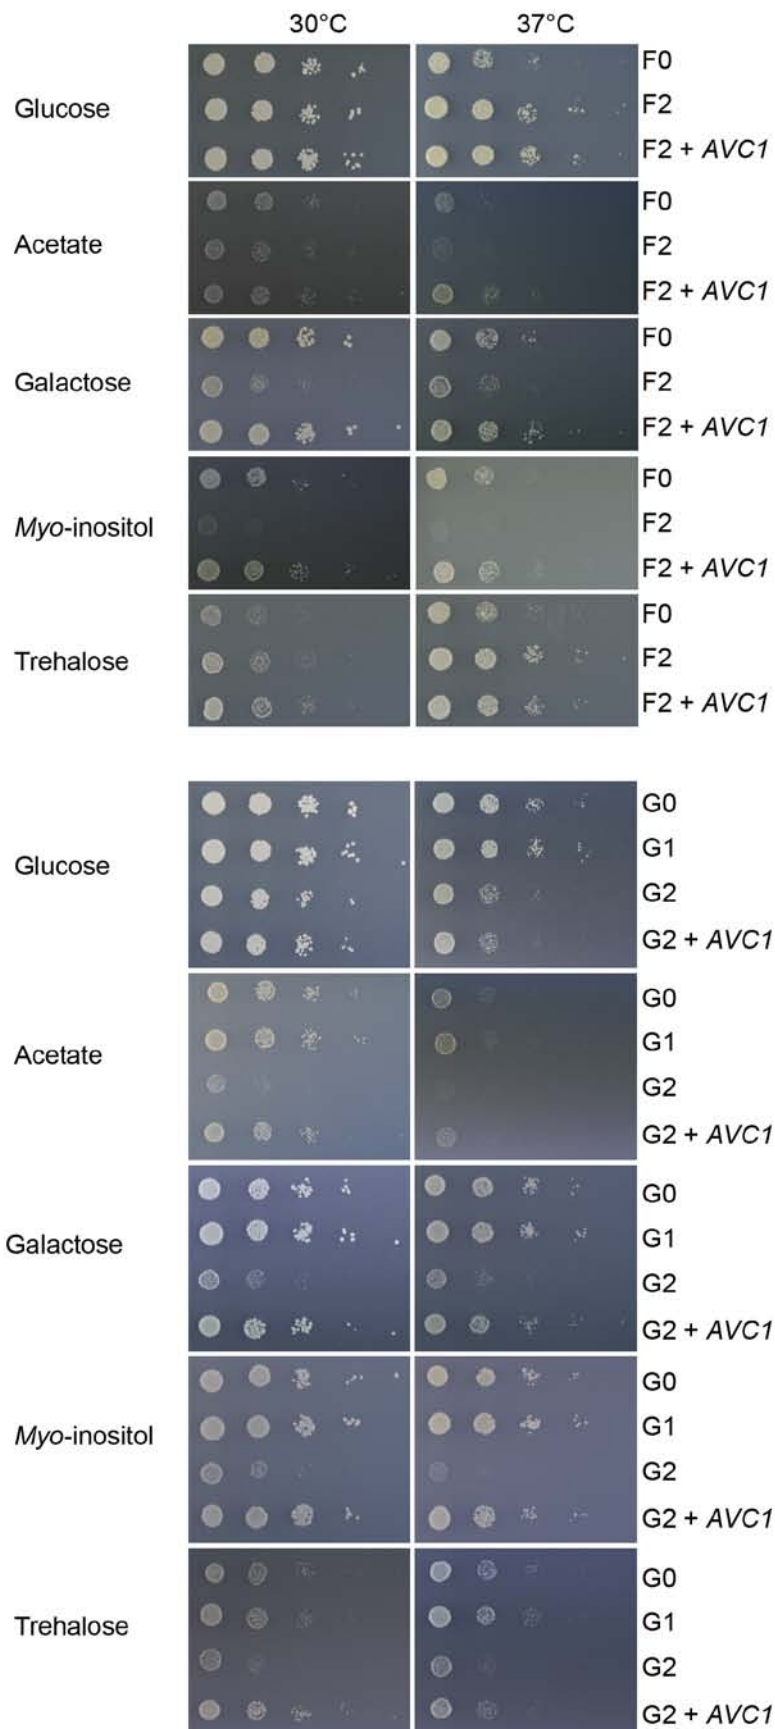

**FIGURE S6** Reintroduction of ARID-containing gene *AVC1* rescues growth on alternate carbon sources. Growth assays on minimal media supplemented with various carbon sources.
