# Supplementary material for: Comparative Genomics of Serial Isolates of Cryptococcus neoformans Reveals Gene Associated With Carbon Utilization and Virulence
Source: PubMed Central journal article supplement (PMC3618354; doi:10.1534/g3.113.005660), 2013-04-01
Supplement: supp_g3.113.005660_FigureS7.pdf [file supp_g3.113.005660_FigureS7.pdf]

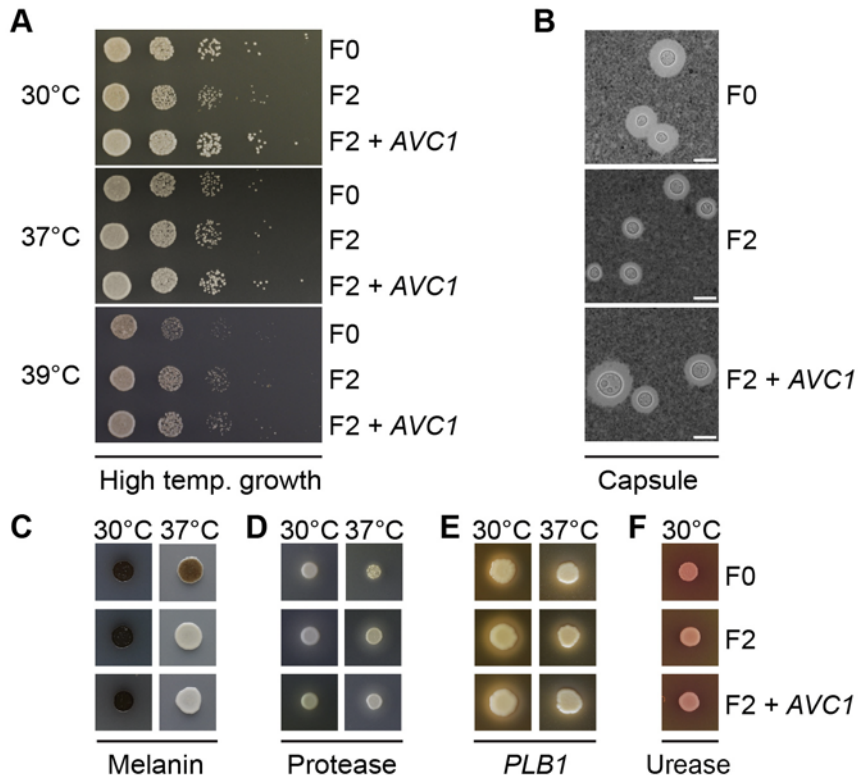

**FIGURE S7 Reintroduction of ARID-containing *AVC1* rescues capsule but not melanin production in F2.** (A) Growth assays at 30°, human body temperature of 37° and febrile body temperature of 39° on YPD; no change was observed following reintroduction of *AVC1*. (B) India ink staining under light microscopy reveals the capsule; capsule production in F2 is increased following reintroduction of *AVC1*. Scale bar is 10 μM. (C) Melanization on L-DOPA containing media continued to be inhibited in F2 following reintroduction of *AVC1*. (D), (E) & (F) Comparable levels of protease, phospholipase and urease production were observed following reintroduction of *AVC1* when strains were grown on BSA, egg yolk and Christensen's agar, respectively.
