# Supplementary material for: Comparative Genomics of Serial Isolates of Cryptococcus neoformans Reveals Gene Associated With Carbon Utilization and Virulence
Source: PubMed Central journal article supplement (PMC3618354; doi:10.1534/g3.113.005660), 2013-04-01
Supplement: supp_g3.113.005660_FigureS9.pdf [file supp_g3.113.005660_FigureS9.pdf]

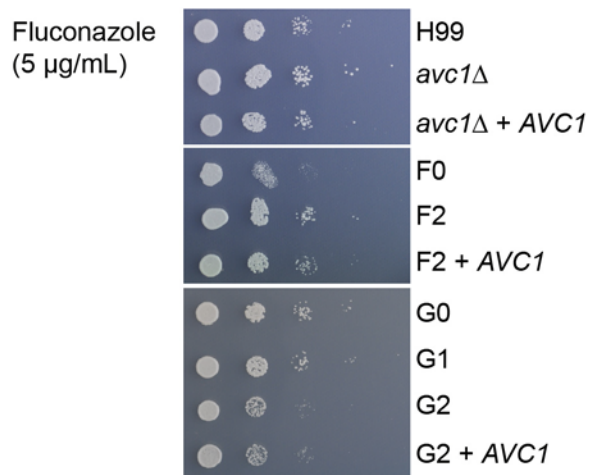

**FIGURE S9 Deletion of *AVC1* increases resistance to fluconazole.** Both *avc1*Δ and F2 exhibit increased growth on minimal media containing fluconazole (5 µg/mL) which is abolished when the gene is reintroduced. Growth is comparable between G2 and G2 + *AVC1*.
