# Supplementary material for: Comparative Genomics of Serial Isolates of Cryptococcus neoformans Reveals Gene Associated With Carbon Utilization and Virulence
Source: PubMed Central journal article supplement (PMC3618354; doi:10.1534/g3.113.005660), 2013-04-01
Supplement: supp_g3.113.005660_TableS1.pdf [file supp_g3.113.005660_TableS1.pdf]

**Table S1A Indels identified between H99 and F0 and F2 within genes with functional annotation**

| Chr | H99                | F0 & F2        | Gene       | Gene function                                 | Effect of mutation on protein                    |
|-----|--------------------|----------------|------------|-----------------------------------------------|--------------------------------------------------|
| 1   | T                  | TCCCACA        | CNAG_00545 | IDN3-B                                        | Insertion of PH in 5x string at 259 (of 1,933)   |
| 1   | T                  | TGGTTCA        | CNAG_00619 | tubulin folding cofactor C                    | Insertion of EP in 4x string at 224 (of 356)     |
| 3   | GTTC               | G              | CNAG_02824 | uncharacterized ACR, COG1565                  | Deletion of R11 (of 543)                         |
| 3   | GCAT               | G              | CNAG_02796 | phospho-2-dehydro-3-deoxyheptonate aldolase   | Deletion of S in 7x string at 281 (of 544)       |
| 3   | AGA                | AC             | CNAG_07527 | $\alpha$ -1,6-mannosyl transferase            | H232E, truncation at 250 (of 518)                |
| 3   | A                  | AAGAAGC        | CNAG_07580 | CAMK/CAMKL/MARK protein kinase                | Insertion of AS in 3x string at 513 (of 1,172)   |
| 3   | GATCGTC            | G              | CNAG_06888 | cytoplasmic protein                           | Deletion of SS in 5x string at 414 (1,037)       |
| 3   | AG                 | A              | CNAG_06888 | cytoplasmic protein                           | G1024A (of 1,037)                                |
| 3   | A                  | ACAAGCC        | CNAG_06920 | ubiquitin-specific protease                   | Insertion of AQ in 3x string at 276 (of 1,109)   |
| 3   | GAGA               | G              | CNAG_06920 | ubiquitin-specific protease                   | Deletion of K501 (of 1,109)                      |
| 3   | C                  | CCTT           | CNAG_06927 | peptidyl-prolyl cis-trans isomerase           | Insertion of E480 (of 513)                       |
| 4   | A                  | ATGATGAAG<br>G | CNAG_05096 | histone deacetylase 3                         | Insertion of SSP151 (of 490)                     |
| 4   | G                  | GGTT           | CNAG_05138 | exo- $\beta$ -1,3-glucanase                   | Insertion of N37 (of 785)                        |
| 4   | C                  | CCAGAAA        | CNAG_05248 | clathrin binding protein                      | Insertion of KQ738 (of 751)                      |
| 4   | G                  | GT             | CNAG_05274 | STE/STE20/YSK protein kinase                  | G727V, truncation at 727 (of 765)                |
| 5   | TA                 | T              | CNAG_00974 | beta-lactamase domain-containing protein      | C188Stop (of 300)                                |
| 7   | G                  | GATGGA         | CNAG_06533 | ATP-dependent permease                        | Insertion of NGNG in 2x string at 648 (of 1,051) |
| 7   | AAAGAGACA<br>TACGT | A              | CNAG_06556 | oxidoreductase                                | Q242R, truncation at 260 (of 323)                |
| 7   | TC                 | T              | CNAG_06623 | <i>myo</i> -inositol oxygenase                | S124L, truncation at 151 (of 315)                |
| 8   | TCCCGCCACC         | T              | CNAG_03189 | DIL and ankyrin domain-containing protein     | G1093D (of 1,105)                                |
| 8   | TGTC               | T              | CNAG_03321 | vacuolar protein sorting-associated protein 9 | Deletion of T in 7x string at 131 (of 714)       |
| 8   | TG                 | T              | CNAG_03339 | biotin transporter                            | H439P, truncation at 458 (of 503)                |
| 8   | AG                 | ATA            | CNAG_03519 | cytoplasmic protein                           | Q453H, truncation at 459 (of 502)                |

| Chr | H99               | F0 & F2        | Gene       | Gene function                                                    | Effect of mutation on protein                 |
|-----|-------------------|----------------|------------|------------------------------------------------------------------|-----------------------------------------------|
| 8   | TC                | T              | CNAG_03533 | JmjC domain-containing histone demethylation protein 1           | A505G, truncation at 557 (of 874)             |
| 9   | A                 | AACC           | CNAG_04213 | signal transducer                                                | Insertion of G152 (of 978)                    |
| 9   | A                 | AAGC           | CNAG_04380 | peptidase                                                        | Insertion of S in 6x string at 250 (of 688)   |
| 10  | T                 | TAGA           | CNAG_04792 | phosphatidyl serine decarboxylase                                | Insertion of E in 4x string at 340 (of 1,230) |
| 10  | G                 | GA             | CNAG_04696 | DNA clamp loader                                                 | S438F, truncation at 444 (of 760)             |
| 11  | A                 | ACGGTGATG<br>G | CNAG_01809 | small nuclear ribonucleoprotein hPrp3                            | Insertion of GGD501 (of 590)                  |
| 11  | TCAACTCCAA<br>CTC | T              | CNAG_02000 | short-chain dehydrogenase                                        | Deletion of SNSN in 3x string at 40 (of 358)  |
| 11  | AG                | A              | CNAG_02016 | DUF1479 domain-containing protein                                | V158L, truncation at 196 (of 493)             |
| 12  | ACAG              | A              | CNAG_06193 | CMGC/RCK protein kinase                                          | Deletion of Q in 5x string at 94 (of 1,262)   |
| 13  | A                 | AC             | CNAG_06499 | phosphatidic acid phosphatase type 2 domain containing 1 protein | C252V, truncation at 297 (of 382)             |

**Table S1B Structural variation identified between H99 and F0 and F2**

| Chr | Type                  | Size (bp) | Gene                               | Gene name                                              |
|-----|-----------------------|-----------|------------------------------------|--------------------------------------------------------|
| 1   | Deletion              | 3,407     | CNAG_00549                         | hypothetical protein                                   |
| 2   | Deletion              | 47        | CNAG_03991                         | integral membrane protein                              |
| 2   | Insertion             | 656       | CNAG_04003 (intron)                | pumilio 2                                              |
| 3   | Deletion              | 383       |                                    |                                                        |
| 3   | Deletion              | 3,409     | CNAG_02711                         | hypothetical protein                                   |
| 3   | Deletion              | 150       | CNAG_02706, CNAG_02707             | hypothetical proteins                                  |
| 4   | Deletion              | 539       |                                    |                                                        |
| 4   | Deletion              | 557       | CNAG_05266 (intron)                | membrane protein                                       |
| 5   | Deletion              | 302       | CNAG_06863                         | hypothetical protein                                   |
| 5   | Deletion              | 716       | CNAG_06843                         | hypothetical protein                                   |
| 5   | Deletion              | 7,459     | CNAG_01367, CNAG_01368             | hypothetical proteins                                  |
| 5   | Deletion              | 475       |                                    |                                                        |
| 5   | Deletion              | 1,413     | CNAG_01032                         | hypothetical protein                                   |
| 6   | Deletion              | 260       |                                    |                                                        |
| 6   | Insertion             | 664       |                                    |                                                        |
| 7   | Tandem duplication    | 643       | CNAG_06557                         | membrane protein                                       |
| 7   | Deletion              | 323       |                                    |                                                        |
| 7   | Insertion/duplication | 7,464     | CNAG_00813/01368, CNAG_00814/01367 | hypothetical proteins                                  |
| 7   | Deletion              | 7,155     | CNAG_05911, CNAG_05910             | hypothetical proteins                                  |
| 7   | Insertion/duplication | 9,600     | CNAG_07313, CNAG_00127, CNAG_00128 | hypothetical proteins                                  |
| 8   | Insertion             | 1,033     | CNAG_07707                         | glycoside hydrolase family 3 domain-containing protein |
| 8   | Insertion             | 915       | CNAG_03195                         | hypothetical protein                                   |
| 8   | Deletion              | 114       |                                    |                                                        |
| 8   | Deletion              | 7,132     | CNAG_03477, CNAG_03478             | hypothetical proteins                                  |
| 8   | Deletion              | 99        |                                    |                                                        |
| 10  | Deletion              | 556       | CNAG_07836 (intron)                | NAD binding dehydrogenase family protein               |
| 10  | Insertion             | 402       |                                    |                                                        |
| 10  | Insertion             | 432       | CNAG_04901                         | hypothetical protein                                   |
| 10  | Insertion             | 664       |                                    |                                                        |
| 10  | Deletion              | 5,210     |                                    |                                                        |
| 10  | Deletion              | 246       |                                    |                                                        |
| 11  | Deletion              | 7,427     | CNAG_07613, CNAG_01968             | hypothetical proteins                                  |
| 13  | Deletion              | 77        | CNAG_06336                         | glucan 1,3 beta-glucosidase                            |
| 13  | Deletion              | 15        |                                    |                                                        |
| 14  | Deletion              | 591       |                                    |                                                        |

---

|           |          |     |            |                      |
|-----------|----------|-----|------------|----------------------|
| <b>14</b> | Deletion | 165 |            |                      |
| <b>14</b> | Deletion | 248 |            |                      |
| <b>14</b> | Deletion | 85  |            |                      |
| <b>14</b> | Deletion | 592 | CNAG_07874 | sugar transporter    |
| <b>14</b> | Deletion | 11  | CNAG_05643 | hypothetical protein |

---
