# Supplementary material for: Comparative Genomics of Serial Isolates of Cryptococcus neoformans Reveals Gene Associated With Carbon Utilization and Virulence
Source: PubMed Central journal article supplement (PMC3618354; doi:10.1534/g3.113.005660), 2013-04-01
Supplement: supp_g3.113.005660_TableS2.pdf [file supp_g3.113.005660_TableS2.pdf]

**Table S2 Genes on the left arm of chromosome 12**

| Strand | Locus      | Length | Start  | Stop   | Name                                                         |
|--------|------------|--------|--------|--------|--------------------------------------------------------------|
| -      | CNAG_06939 | 1,938  | 204    | 2,141  | conserved hypothetical protein                               |
| -      | CNAG_06938 | 432    | 4,923  | 5,354  | conserved hypothetical protein                               |
| -      | CNAG_07026 | 670    | 7,207  | 7,876  | conserved hypothetical protein                               |
| +      | CNAG_07894 | 287    | 9,950  | 10,236 | conserved hypothetical protein                               |
| -      | CNAG_05986 | 1,052  | 12,447 | 13,498 | conserved hypothetical protein                               |
| -      | CNAG_05987 | 1,083  | 13,917 | 14,999 | conserved hypothetical protein                               |
| -      | CNAG_05988 | 580    | 15,532 | 16,111 | conserved hypothetical protein                               |
| +      | CNAG_05989 | 1,900  | 17,145 | 19,044 | predicted protein                                            |
| -      | CNAG_05990 | 2,564  | 19,424 | 21,987 | predicted protein                                            |
| +      | CNAG_05991 | 1,886  | 22,684 | 24,569 | glycosyl hydrolase family 88                                 |
| +      | CNAG_05992 | 2,338  | 25,550 | 27,887 | conserved hypothetical protein                               |
| -      | CNAG_05993 | 2,668  | 27,970 | 30,637 | transmembrane transporter Liz1                               |
| +      | CNAG_05994 | 2,256  | 31,431 | 33,686 | multidrug transporter                                        |
| -      | CNAG_05995 | 2,215  | 34,421 | 36,635 | conserved hypothetical protein                               |
| +      | CNAG_05996 | 3,075  | 38,318 | 41,392 | amino acid transporter                                       |
| -      | CNAG_05997 | 849    | 42,493 | 43,341 | conserved hypothetical protein                               |
| +      | CNAG_05998 | 1,353  | 43,606 | 44,958 | rho GTPase                                                   |
| -      | CNAG_05999 | 974    | 45,350 | 46,323 | peptide alpha-N-acetyltransferase                            |
| +      | CNAG_06000 | 1,986  | 46,804 | 48,789 | glycoprotein                                                 |
| +      | CNAG_06001 | 1,923  | 49,240 | 51,162 | phosphomevalonate kinase                                     |
| -      | CNAG_06002 | 1,752  | 51,476 | 53,227 | tRNA (5-methylaminomethyl-2-thiouridylate)-methyltransferase |
| +      | CNAG_06003 | 912    | 54,177 | 55,088 | conserved hypothetical protein                               |
| -      | CNAG_06004 | 1,440  | 55,430 | 56,869 | conserved hypothetical protein                               |
| +      | CNAG_06005 | 3,065  | 57,220 | 60,284 | conserved hypothetical protein                               |
| -      | CNAG_06006 | 1,542  | 60,590 | 62,131 | conserved hypothetical protein                               |
| +      | CNAG_06007 | 1,057  | 62,416 | 63,472 | hypothetical protein                                         |
| +      | CNAG_06008 | 1,378  | 63,801 | 65,178 | asparaginase                                                 |
| +      | CNAG_06009 | 2,427  | 65,715 | 68,141 | cyclohydrolase                                               |
| -      | CNAG_07895 | 402    | 70,290 | 70,691 | predicted protein                                            |
| -      | CNAG_06010 | 2,541  | 71,423 | 73,963 | fatty aldehyde dehydrogenase                                 |
| +      | CNAG_06011 | 2,097  | 74,927 | 77,023 | conserved hypothetical protein                               |
| -      | CNAG_06012 | 1,508  | 77,134 | 78,641 | NADH-cytochrome b5 reductase                                 |
| +      | CNAG_06013 | 2,116  | 78,850 | 80,965 | vacuolar protein                                             |
| -      | CNAG_06014 | 891    | 81,022 | 81,912 | predicted protein                                            |
| -      | CNAG_06015 | 651    | 81,943 | 82,593 | predicted protein                                            |
| -      | CNAG_07896 | 702    | 83,434 | 84,135 | predicted protein                                            |
| -      | CNAG_06016 | 2,025  | 85,492 | 87,516 | capsule associated protein 6                                 |
| +      | CNAG_06017 | 573    | 88,620 | 89,192 | predicted protein                                            |
| +      | CNAG_06018 | 2,421  | 89,818 | 92,238 | aldehyde dehydrogenase                                       |
| +      | CNAG_06019 | 5,653  | 93,866 | 99,518 | conserved hypothetical protein                               |

| Strand | Locus      | Length | Start   | Stop    | Name                                         |
|--------|------------|--------|---------|---------|----------------------------------------------|
| -      | CNAG_06020 | 1,738  | 100,066 | 101,803 | conserved hypothetical protein               |
| +      | CNAG_06021 | 2,681  | 103,158 | 105,838 | rab GTPase activator                         |
| -      | CNAG_06022 | 1,429  | 105,986 | 107,414 | trans-aconitate 3-methyltransferase          |
| +      | CNAG_06023 | 678    | 107,717 | 108,394 | conserved hypothetical protein               |
| -      | CNAG_06024 | 1,294  | 108,487 | 109,780 | peroxin 14                                   |
| +      | CNAG_06026 | 2,187  | 110,990 | 113,176 | aspartate transaminase                       |
| -      | CNAG_06027 | 2,064  | 112,960 | 115,023 | aryl-alcohol dehydrogenase                   |
| -      | CNAG_06028 | 1,242  | 116,243 | 117,484 | conserved hypothetical protein               |
| +      | CNAG_06029 | 741    | 117,802 | 118,542 | conserved hypothetical protein               |
| -      | CNAG_06030 | 1,968  | 118,609 | 120,576 | conserved hypothetical protein               |
| +      | CNAG_06031 | 1,177  | 122,495 | 123,671 | $\beta$ -glucan synthesis-associated protein |
| +      | CNAG_06032 | 948    | 124,300 | 125,247 | ADP-ribosylation factor-like protein 2       |
| -      | CNAG_06033 | 1,661  | 125,368 | 127,028 | pfkB family carbohydrate kinase superfamily  |
| +      | CNAG_06034 | 2,158  | 131,492 | 133,649 | allantoin permease                           |
| -      | CNAG_06035 | 1,814  | 134,163 | 135,976 | alcohol dehydrogenase                        |
| +      | CNAG_06036 | 2,651  | 136,817 | 139,467 | aminotransferase LoIT-1                      |
