# Supplementary material for: Comparative Genomics of Serial Isolates of Cryptococcus neoformans Reveals Gene Associated With Carbon Utilization and Virulence
Source: PubMed Central journal article supplement (PMC3618354; doi:10.1534/g3.113.005660), 2013-04-01
Supplement: supp_g3.113.005660_TableS3.pdf [file supp_g3.113.005660_TableS3.pdf]

**Table S3 Statistical parameters of multivariate PCA models of metabolomic data**

| <b>Model</b> | <b>N</b> | <b>k</b> | <b>A</b> | <b>R<sup>2</sup>X</b> | <b>Q<sup>2</sup></b> | <b>Scaling</b> | <b>Comparison</b>        | <b>Figure</b> |
|--------------|----------|----------|----------|-----------------------|----------------------|----------------|--------------------------|---------------|
| <b>M1</b>    | 34       | 9151     | 6        | 0.919                 | 0.85                 | Pareto         | All samples              | 3A            |
| <b>M2</b>    | 11       | 9151     | 3        | 0.876                 | 0.698                | Pareto         | F0 vs. F2 in YNB medium  | 3B & C        |
| <b>M3</b>    | 11       | 9151     | 2        | 0.936                 | 0.889                | Centre         | F0 vs. F2 in YNB medium  | 3B & C        |
| <b>M4</b>    | 12       | 9151     | 3        | 0.785                 | 0.458                | Pareto         | F0 vs. F2 in YPD medium  | S5A & B       |
| <b>M5</b>    | 12       | 9151     | 5        | 0.98                  | 0.866                | Centre         | F0 vs. F2 in YPD medium  | S5A & B       |
| <b>M6</b>    | 12       | 9151     | 4        | 0.916                 | 0.826                | Pareto         | F2 in YNB vs. YPD medium | S5C & D       |
| <b>M7</b>    | 12       | 9151     | 3        | 0.986                 | 0.961                | Centre         | F2 in YNB vs. YPD medium | S5C & D       |
| <b>M8</b>    | 11       | 9151     | 3        | 0.848                 | 0.545                | Pareto         | F0 in YNB vs. YPD medium | S5E & F       |
| <b>M9</b>    | 11       | 9151     | 2        | 0.838                 | 0.567                | Centre         | F0 in YNB vs. YPD medium | S5E & F       |

N= number of samples, k= number of x-variables (buckets), A= number of principal components in the model, R<sup>2</sup>X=sum of squares of all x-variables explained by the model, Q<sup>2</sup>= cumulative cross-validated R<sup>2</sup>.
