# Supplementary material for: Comparative Genomics of Serial Isolates of Cryptococcus neoformans Reveals Gene Associated With Carbon Utilization and Virulence
Source: PubMed Central journal article supplement (PMC3618354; doi:10.1534/g3.113.005660), 2013-04-01
Supplement: supp_g3.113.005660_TableS4.pdf [file supp_g3.113.005660_TableS4.pdf]

**Table S4 Primers used in this study**

| <b>Primer ID</b> | <b>Sequence</b>       |
|------------------|-----------------------|
| UQ623            | CAGGTCAAGGAAAGGCAACAG |
| UQ624            | TGCCCTGAAGTTGGTTAGACT |
| UQ702            | ACAAAATCCACGCATACAGAA |
| UQ703            | CGCCACCATCCAAACGTCAA  |
| UQ704            | CAATCCCTTTGCCATCTGAAC |
| UQ705            | GGTCAACCGCCTGTTTCTAAT |
| UQ706            | CCCATATTATCCCAATCTGA  |
| UQ707            | CCTGCATTGTTGCCTCTCTA  |
| UQ708            | GCGTGGCCGACCTTACCTCAG |
| UQ709            | CCAATACACCAACAGCGTGAC |
| UQ801            | GCGAAAGGGTGAGAAGTGA   |
| UQ802            | CACTAAAGGGCGGCCATTAAA |
| UQ1836           | AGCTCTACCCACTACCGAATC |
| UQ1837           | CGACGATGACTCCCACTACCA |
| UQ1838           | CACCTGGAGAAGTTCGCTGAG |
| UQ1839           | GGCTGAACATTGTCGCTTATT |
| UQ1840           | TGTGGGATGAATGTAAGTGCT |
| UQ1842           | GGACTTTGCTTCGGATGATCT |
| UQ1843           | CACATGCTCGCTTAGTTGC   |
| UQ1844           | TATCAGCGAAATACGACAAGG |
| UQ1845           | GCTAGTCACAGGTCGTCGGT  |
| UQ1846           | GCACTTCCAACGCAGGTT    |
| UQ1847           | CGCTCTTGCTTTGACCAACTC |
| UQ1848           | TTGCAATGACAAAAGGCTTAT |
| UQ1849           | TGCTCTCCACCACTTCGATT  |
| UQ1850           | CGGCAGGTTTCGATATGG    |
| UQ1851           | TGTTGTTGTTGCGTAGTCGTC |
| UQ1852           | CAGGCTAGTGAGTCGGCTACA |
| UQ1853           | CGGGGAATTCGATCATC     |
| UQ1854           | CTCCTCGCACGGTTCTC     |
| UQ1855           | TGGAGGCTCGTGACATATGAA |
| UQ1856           | AGCCATTTCTTTCAGTCGAGC |
| UQ1857           | GGGGTTTGATTGGTGCAAG   |
| UQ1858           | CCTCCGTCCTCCGAGTCGTT  |
| UQ1859           | GGAAGAAATTGGGTAAGCC   |
| UQ1860           | AAACATGTCTACCGTTGACCC |
| UQ1861           | CGGAGGTGAAATAGAACGC   |
| UQ1862           | CCTTATCCAAGATTCCGTGA  |
| UQ1865           | CGGCATAGAGAACGGGAAG   |
| UQ1866           | ACGCTTTCAGACCCTCGTTCT |
| UQ1869           | TCTTGAATCTGCGAGCGTGAA |
| UQ1870           | CACCGAAAGAAGCGTCTAAAC |
| UQ1873           | CTTCTCCATCCATGCTGACA  |
| UQ1874           | CGGCCTCATGATGTTAAGT   |
| UQ1877           | CGGCATAGAGAACGGGAAG   |
| UQ1878           | GTACCGTAGTGCGCTGA     |
| UQ1881           | AGCCGACGACGAAGTTCA    |
| UQ1882           | CACAAAGACCTTGCCATTATG |
| UQ1885           | CAAAAAAAGATTCTCCCTCC  |
| UQ1886           | CCCTGAACCAGCCGTCT     |
| UQ1889           | GTATTGGAGGCACGGCAGA   |

| Primer ID | Sequence                                       |
|-----------|------------------------------------------------|
| UQ1894    | GGCGATGGTAAAGATGATAGC                          |
| UQ1897    | CTCTCAAGAAGACGCTGACTT                          |
| UQ1898    | GGCCTGGTGTGCGTATTG                             |
| UQ1899    | CGCATCCTTCAATGACATTGG                          |
| UQ1902    | GTCATCCGCAACTCATATCA                           |
| UQ1903    | TGCTGTAGCGTCTGCGTGTGA                          |
| UQ1904    | TCAAGCGAACTTAAAGGGTAA                          |
| UQ1905    | AGGCGTTGGACTTCGAC                              |
| UQ1906    | CCATACTTTTTGCCGTTTAC                           |
| UQ1907    | GGCCCAGGAGGTGATCAATTT                          |
| UQ1908    | CGCGCCTTTCCTATCTC                              |
| UQ1909    | GATGTGGGAATGACGGGAGTC                          |
| UQ1910    | GAAATGTTCCCGTGTGTCAT                           |
| UQ1911    | CGAAATTGTTGCCGATTG                             |
| UQ1986    | GGAGGTGGACTGTATTGTGAG                          |
| UQ1987    | CAATAATATCGTCTCGGGTGG                          |
| UQ1990    | CGATGGATTTTAACCGTGACT                          |
| UQ1991    | CCCGTATTTCAAACACTCTCA                          |
| UQ1994    | CAGGGCACGAAAGGGACAGGT                          |
| UQ1995    | GGGAAGTGATTGAGCATTTTT                          |
| UQ1998    | CGACGGCTGAAGAACAAGGTG                          |
| UQ1999    | ATCCGTAATCATTGCCAACAC                          |
| UQ2000    | GCTCGCACTTCACTACTTTC                           |
| UQ2001    | GTTGTGCTGGCTGCTGTTGTT                          |
| UQ2004    | GCCCAAGGAAGGAAAGCTCAA                          |
| UQ2005    | GGCTTGAGGCCAAAAGACGACA                         |
| UQ2006    | GGTGGACGAGAAGGATGAAAA                          |
| UQ2007    | CGTCAGACCTAGCGTTTACTT                          |
| UQ2008    | CTGCCAGTTATGAGCTGTCCG                          |
| UQ2009    | TGCTTGATGTTGTCGCATT                            |
| UQ2010    | TGGGGGACAGGGATGCACGGA                          |
| UQ2011    | AAAGGCAAGTACGTCGAAAA                           |
| UQ2012    | AAGAAGTCGATCTCCGCTCA                           |
| UQ2013    | TAGGCTTCACTGACACACAAA                          |
| UQ2014    | ATAAAAACCGCCAGGTCTGC                           |
| UQ2015    | CCTACTTCTGTAGTAGCTGG                           |
| UQ2016    | ACAGGGAAATGCTAAAAGTAT                          |
| UQ2017    | AAGTTCGGGTA CTGCTCTC                           |
| UQ2018    | CACTTACTGCCAGTCCACCA                           |
| UQ2023    | CAGTGAGCCATCCTTACAGTC                          |
| UQ2024    | AAACGATGATGCTGGAATTAC                          |
| UQ2025    | CTGAGCATAATAATGGCGTCC                          |
| UQ2026    | GAGATAAGGTCATCGCAAAC                           |
| UQ2072    | TGTACGAAGGCTATGAAGCTG                          |
| UQ2073    | GATGGCGTGTACTGTACTCT                           |
| UQ2074    | TCACCGCTCGCTAAACCTGTT                          |
| UQ2075    | CTAGGGTTTGGACGCACAACT                          |
| UQ2076    | GGATACCAGCAATTCCTCCA                           |
| UQ2087    | TCTCAGATCCTTCCCTTTGTC                          |
| UQ2088    | CGCTCTCCAGCTCACATCCTCGCAGCTGAAACAGGATGT        |
| UQ2089    | CTACATCTTCCGTGTTAATACAGATAAACCGATGGTGGATGAGCTT |
| UQ2090    | CTTTTTCGTTCAATCCTGCTT                          |
| UQ2091    | ACATCCTGTTTCAGCTGCGAGGATGTGAGCTGGAGAGCG        |

| Primer ID | Sequence                                        |
|-----------|-------------------------------------------------|
| UQ2092    | AAGTCATCCACCATCGGTTTATCTGTATTAACACGGAAGAGATGTAG |
| UQ2093    | CCGGAAGAGTGCTTGCAGATT                           |
| UQ2094    | TTCGCCTCTGGACCGTGAATG                           |
| UQ2095    | ACTTGAGCATTTGCGGGTGTG                           |
| UQ2096    | TTCCAGCACCAGCGTTCTTG                            |
| UQ2097    | TGCTGACTGGGCCCTTGCCT                            |
| UQ2098    | GTGCGCATGAATTCGTGGACT                           |
| UQ2099    | CAAACCCCTTCCCGGACGACT                           |
| UQ2156    | CTAGGAATGAACATGGGAATG                           |
| UQ2157    | TAGTTTGTAGTTGACCGGTT                            |
| UQ2158    | AGTGCACGAGTTATTGAAGA                            |
| UQ2159    | CAGAAAGATCGAGAGAAACAG                           |
| UQ2160    | TAAATCTTGTCGTTGGGGTC                            |
| UQ2263    | AAATGCAGCGGAACCAAATC                            |
| UQ2264    | AGAGCTAAGTTAAATGGGGGG                           |
